# Supplementary material for: Genetics and breeding of phenolic content in tomato, eggplant and pepper fruits
Source: Front Plant Sci. 2023 Mar 21;14:1135237. doi: 10.3389/fpls.2023.1135237 (PMC10070870; doi:10.3389/fpls.2023.1135237)
Supplement: Supplementary file 1 [file Table_1.xlsx]

## Sheet: S1.1 Key enzymes abbreviations
Supplementary Data S1 - Annotated structural genes of the phenylpropanoid pathway.
Supplementary Table S1.1 - Key enzymes of the phenylpropanoid pathway names and abbreviations.
Name	Abbreviation
phenylalanine ammonia-lyase (PAL)	PAL
cinnamate 4-hydroxylase (C4H)	C4H
4-coumaroyl-CoA ligase (4CL)	4CL
4-coumarate 3-hydroxylase (C3H)	C3H
caffeate O-methyltransferase (COMT)	COMT
ferulate 5-hydroxylase (F5H)	F5H
hydroxycinnamoyl-CoA:shikimate/quinate hydroxycinnamoyl transferase (HCT)	HCT
p-coumaroyl ester 3′-hydroxylase (C3’H)	C3'H
hydroxycinnamoyl-CoA:quinate hydroxycinnamoyl transferase (HQT)	HQT
chalcone synthase (CHS)	CHS
chalcone isomerase (CHI)	CHI
flavanone-3-hydroxylase (F3H)	F3H
flavanone-3’-hydroxylase (F3’H)	F3'H
flavonoid-3’,5’-hydroxylase (F3’5’H)	F3'5'H
flavonol synthase (FLS)	FLS
dihydroflavonol 4-reductase (DFR)	DFR
anthocyanidin synthase (ANS)	ANS
flavone synthase (FNS-I)	FNS-I
flavone synthase (FNS-II)	FNS-II

## Sheet: S1.2 Tomato structural genes
Supplementary Table S1.2 - Annotated putative orthologue genes encoding key enzymes involved in tomato phenylpropanoid pathway retrieved from ITAG4.0 with an e-value threshold of 1·e-10, score >200 and identity >70%.
Enzyme	SubjectId	id%	Aln	evalue	Score	Description	Chr.	Description ITAG4.0	Position (Mpb)
PAL	Solyc09g007920.4.1	94.90	670/706	0.0	1384	unnamed protein productLength=721	9	Phenylalanine ammonia-lyase (AHRD V3.3 *** A0A2G3BJ81_CAPCH)	SL4.0ch09:1455211..1458871
	Solyc09g007900.4.1	94.76	669/706	0.0	1380	unnamed protein productLength=769	9	Phenylalanine ammonia-lyase (AHRD V3.3 *** A0A2G3BJ81_CAPCH)	SL4.0ch09:1438652..1441865
	Solyc09g007910.4.1	94.33	666/706	0.0	1374	unnamed protein productLength=764	9	Phenylalanine ammonia-lyase (AHRD V3.3 *** A0A2G2YQ27_CAPAN)	SL4.0ch09:1448725..1451121
	Solyc09g007890.1.1	91.50	646/706	0.0	1335	unnamed protein productLength=719	9	Phenylalanine ammonia-lyase (AHRD V3.3 *** A0A2G3BJ62_CAPCH)	SL4.0ch09:1433147..1435469
	Solyc10g086180.2.1	88.07	620/704	0.0	1291	unnamed protein productLength=711	10	Phenylalanine ammonia-lyase (AHRD V3.3 *** A0A2G2VU16_CAPBA)	SL4.0ch10:64248745..64252443
	Solyc05g056170.3.1	82.01	570/695	0.0	1168	unnamed protein productLength=709	5	Phenylalanine ammonia-lyase (AHRD V3.3 *** A0A2G2WVC6_CAPBA)	SL4.0ch05:64942498..64946271
	Solyc10g011925.1.1	91.34	496/543	0.0	1032	unnamed protein productLength=544	10	Phenylalanine ammonia-lyase (AHRD V3.3 *** A0A2G3BJ62_CAPCH)	SL4.0ch10:4005701..4013235
	Solyc03g042560.3.1	99.47	378/380	0.0	784	unnamed protein productLength=380	3	Phenylalanine ammonia-lyase (AHRD V3.3 *** A0A2G2YQ27_CAPAN)	SL4.0ch03:6310075..6312855
	Solyc03g078280.3.1	73.20	224/306	2e-147	431	unnamed protein productLength=258	3	Phenylalanine ammonia-lyase (AHRD V3.3 *-* A0A2G3BJ81_CAPCH)	SL4.0ch03:44839283..44840186
	Solyc03g071870.1.1	85.04	108/127	3e-65	214	unnamed protein productLength=172	3	Phenylalanine ammonia-lyase (AHRD V3.3 *-* A0A2G2VZP0_CAPBA)	SL4.0ch03:15894061..15894815
C4H	Solyc06g150137.1.1	94.06	475/505	0.0	971	unnamed protein productLength=505	6	Cytochrome P450 (AHRD V3.3 *** A0A2U1MXM4_ARTAN)	SL4.0ch06:45897128..45906931
	Solyc05g047530.3.1	65.55	314/479	0.0	663	unnamed protein productLength=528	5	trans-cinnamate 4-monooxygenase	SL4.0ch05:58353753..58355726
4CL	Solyc03g117870.3.1	100.00	545/545	0.0	1119	unnamed protein productLength=545	3	4-coumarate:CoA ligase (AHRD V3.3 *** Q42879_LITER)	SL4.0ch03:61331502..61335276
	Solyc06g068650.4.1	86.95	473/544	0.0	979	unnamed protein productLength=548	6	4-coumarate:CoA ligase (AHRD V3.3 *** Q42879_LITER)	SL4.0ch06:40192332..40196332
	Solyc12g042460.2.1	79.27	432/545	0.0	853	unnamed protein productLength=548	12	4-coumarate:CoA ligase (AHRD V3.3 *** Q42879_LITER)	SL4.0ch12:57386032..57391931
	Solyc07g008360.2.1	71.22	391/549	0.0	815	unnamed protein productLength=568	7	4-coumarate:CoA ligase (AHRD V3.3 *** Q42879_LITER)	SL4.0ch07:3116250..3120462
C3H	Solyc01g096670.4.1	79.96	403/504	0.0	860	unnamed protein productLength=518	1	Cytochrome P450 (AHRD V3.3 *** A0A2U1MC34_ARTAN)	SL4.0ch01:79960538..79963550
	Solyc10g078240.2.1	73.48	374/509	0.0	819	unnamed protein productLength=509	10	Cytochrome P450 (AHRD V3.3 *** A0A2U1MC34_ARTAN)	SL4.0ch10:59207963..59210905
COMT	Solyc03g080180.4.1	88.06	317/360	0.0	681	unnamed protein productLength=373	3	O-methyltransferase	SL4.0ch03:46612161..46616051
F5H	Solyc02g084570.4.1	97.37	518/532	0.0	1076	unnamed protein productLength=574	2	Cytochrome P450 (AHRD V3.3 *** A0A2U1M5X8_ARTAN)	SL4.0ch02:45661366..45665216
HCT	Solyc03g117600.3.1	79.31	345/435	0.0	720	unnamed protein productLength=435	3	Transferase (AHRD V3.3 *** A0A200QII6_9MAGN)	SL4.0ch03:61166312..61171756
C3'H	Solyc01g096670.4.1	79.96	403/504	0.0	862	unnamed protein productLength=518	1	Cytochrome P450 (AHRD V3.3 *** A0A2U1MC34_ARTAN)	SL4.0ch01:79960538..79963550
	Solyc10g078240.2.1	73.48	374/509	0.0	822	unnamed protein productLength=509	10	Cytochrome P450 (AHRD V3.3 *** A0A2U1MC34_ARTAN)	SL4.0ch10:59207963..59210905
HQT	Solyc07g005760.3.1	100.00	430/430	0.0	888	unnamed protein productLength=430	7	hydroxycinnamoyl CoA quinate transferase	SL4.0ch07:592377..596297
CHS	Solyc09g091510.3.1	100.00	389/389	0.0	801	unnamed protein productLength=389	9	chalcone synthase 1	SL4.0ch09:66873902..66876060
	Solyc05g053550.3.1	92.27	358/388	0.0	754	unnamed protein productLength=389	5	chalcone synthase 2	SL4.0ch05:63019803..63021508
	Solyc12g098090.1.1	73.90	286/387	0.0	597	unnamed protein productLength=438	12	Chalcone synthase (AHRD V3.3 *** I4DH96_PETHY)	SL4.0ch12:65273268..65275129
	Solyc05g053170.3.1	69.74	265/380	0.0	573	unnamed protein productLength=392	5	Chalcone synthase (AHRD V3.3 *** A0A2G2ZJX1_CAPAN)	SL4.0ch05:62690618..62694141
	Solyc06g043120.1.1	68.99	109/158	2e-66	209	unnamed protein productLength=160	6	Chalcone synthase (AHRD V3.3 *-* Q6X0M8_SOYBN)	SL4.0ch06:27530129..27530611
CHI	Solyc05g010320.4.1	100.00	226/226	2e-167	462	unnamed protein productLength=226	5	Chalcone-flavonone isomerase family protein (AHRD V3.3 *** A0A193AUW5_SOLME)	SL4.0ch05:4511004..4513638
	Solyc05g010310.3.1	75.45	169/224	1e-118	338	unnamed protein productLength=222	5	Chalcone-flavonone isomerase family protein (AHRD V3.3 *** A0A193AUW5_SOLME)	SL4.0ch05:4506667..4508309
F3H	Solyc02g083860.3.1	100.00	362/362	0.0	751	unnamed protein productLength=362	2	2-oxoglutarate (2OG) and Fe(II)-dependent oxygenase superfamily protein (AHRD V3.3 *** A0A2U1QGX7_ARTAN)	SL4.0ch02:45122808..45124818
F3'H	Solyc03g115220.4.1	100.00	514/514	0.0	1061	unnamed protein productLength=528	3	Flavonoid 3'-monooxygenase (AHRD V3.3 *** A0A2G2WR53_CAPBA)	SL4.0ch03:59425138..59430565
F3'5'H	Solyc11g066580.3.1	100.00	511/511	0.0	1054	unnamed protein productLength=560	11	Flavonoid 3`5`-hydroxylase (AHRD V3.3 *** D3W9H7_SOLLC)	SL4.0ch11:50364286..50368120
FLS	Solyc11g013110.2.1	100.00	352/352	0.0	729	unnamed protein productLength=352	11	2-oxoglutarate (2OG) and Fe(II)-dependent oxygenase superfamily protein (AHRD V3.3 *** AT1G49390.1)	SL4.0ch11:6036083..6040376
DFR	Solyc02g085020.4.1	99.21	379/382	0.0	787	unnamed protein productLength=379	2	dihydroflavonol 4-reductase	SL4.0ch02:46065285..46067689
ANS	Solyc08g080040.4.1	88.81	365/411	0.0	746	unnamed protein productLength=418	8	2-oxoglutarate (2OG) and Fe(II)-dependent oxygenase superfamily protein (AHRD V3.3 *** F4J670_ARATH)	SL4.0ch08:61491075..61492935
FNS-I	-
FNS-II	-

## Sheet: S1.3 Eggplant structural genes
Supplementary Table S1.3 - Annotated putative orthologue genes encoding key enzymes involved in eggplant phenylpropanoid pathway retrieved from ITAG4.0 with an e-value threshold of 1·e-10, score >200 and identity >70%.
Enzyme	SubjectId	id%	Aln	evalue	Score	Description	Chr.	Description v3	Position (Mbp)
PAL	SMEL_009g321780.1.01	92.70	648/699	0.0	1346	gene=SMEL_009g321780.1 Name:"Similar to PAL5 Phenylalanine ammonia-lyase (Solanum lycopersicum OX=4081)" Length=854	9	Similar to PAL5: Phenylalanine ammonia-lyase (Solanum lycopersicum OX=4081)	SMEL3Ch09:3648933..3652669
	SMEL_001g120570.1.01	88.90	625/703	0.0	1293	gene=SMEL_001g120570.1 Name:"Similar to PALA Phenylalanine ammonia-lyase (Nicotiana tabacum OX=4097)" Length=712	1	Similar to PALA: Phenylalanine ammonia-lyase (Nicotiana tabacum OX=4097)	SMEL3Ch01:5523629..5527285
	SMEL_007g290860.1.01	81.70	576/705	0.0	1168	gene=SMEL_007g290860.1 Name:"Similar to TPA1 Phenylalanine ammonia-lyase (Nicotiana tabacum OX=4097)" Length=689	7	Similar to TPA1: Phenylalanine ammonia-lyase (Nicotiana tabacum OX=4097)	SMEL3Ch07:134886780..134892190
	SMEL_005g230690.1.01	80.68	572/709	0.0	1168	gene=SMEL_005g230690.1 Name:"Similar to Phenylalanine ammonia-lyase (Nicotiana tabacum OX=4097)" Length=716	5	Similar to Phenylalanine ammonia-lyase (Nicotiana tabacum OX=4097)	SMEL3Ch05:10117281..10121217
	SMEL_004g206160.1.01	77.85	457/587	0.0	903	gene=SMEL_004g206160.1 Name:"Similar to TPA1 Phenylalanine ammonia-lyase (Nicotiana tabacum OX=4097)" Length=552	4	Similar to TPA1: Phenylalanine ammonia-lyase (Nicotiana tabacum OX=4097)	SMEL3Ch04:22269191..22270937
	SMEL_009g321790.1.01	69.18	110/159	1e-64	212	gene=SMEL_009g321790.1 Name:"Similar to PAL5 Phenylalanine ammonia-lyase (Solanum lycopersicum OX=4081)" Length=175	9	Similar to PAL5: Phenylalanine ammonia-lyase (Solanum lycopersicum OX=4081)	SMEL3Ch09:3659729..3660290
C4H	SMEL_006g269090.1.01	94.26	476/505	0.0	993	gene=SMEL_006g269090.1 Name:"Similar to CYP73A4 Trans-cinnamate 4-monooxygenase (Catharanthus roseus OX=4058)" Length=505	6	Similar to CYP73A4: Trans-cinnamate 4-monooxygenase (Catharanthus roseus OX=4058)	SMEL3Ch06:107334189..107337986
	SMEL_006g269100.1.01	92.34	482/522	0.0	989	gene=SMEL_006g269100.1 Name:"Similar to CYP73A4 Trans-cinnamate 4-monooxygenase (Catharanthus roseus OX=4058)" Length=522	6	Similar to CYP73A4: Trans-cinnamate 4-monooxygenase (Catharanthus roseus OX=4058)	SMEL3Ch06:107339811..107342889
4CL	SMEL_003g194300.1.01	96.70	527/545	0.0	1087	gene=SMEL_003g194300.1 Name:"Similar to 4CL1 4-coumarate--CoA ligase 1 (Solanum tuberosum OX=4113)" Length=545	3	Similar to 4CL1: 4-coumarate--CoA ligase 1 (Solanum tuberosum OX=4113)	SMEL3Ch03:91381116..91385000
	SMEL_006g261630.1.01	85.53	467/546	0.0	972	gene=SMEL_006g261630.1 Name:"Similar to 4CL2 4-coumarate--CoA ligase 2 (Nicotiana tabacum OX=4097)" Length=542	6	Similar to 4CL2: 4-coumarate--CoA ligase 2 (Nicotiana tabacum OX=4097)	SMEL3Ch06:100462531..100466689
	SMEL_007g275930.1.01	70.40	383/544	0.0	824	gene=SMEL_007g275930.1 Name:"Similar to 4CL1 4-coumarate--CoA ligase 1 (Nicotiana tabacum OX=4097)" Length=565	7	Similar to 4CL1: 4-coumarate--CoA ligase 1 (Nicotiana tabacum OX=4097)	SMEL3Ch07:17721926..17726268
C3H	SMEL_001g127960.1.01	80.36	405/504	0.0	866	gene=SMEL_001g127960.1 Name:"Similar to CYP98A2 Cytochrome P450 98A2 (Glycine max OX=3847)" Length=512	1	Similar to CYP98A2: Cytochrome P450 98A2 (Glycine max OX=3847)	SMEL3Ch01:14167115..14170468
	SMEL_010g358590.1.01	72.24	367/508	0.0	807	gene=SMEL_010g358590.1 Name:"Similar to CYP98A2 Cytochrome P450 98A2 (Glycine max OX=3847)" Length=508	10	Similar to CYP98A2: Cytochrome P450 98A2 (Glycine max OX=3847)	SMEL3Ch10:103380160..103383836
COMT	SMEL_003g185620.1.01	87.53	316/361	0.0	680	gene=SMEL_003g185620.1 Name:"Similar to COMT Caffeic acid 3-O-methyltransferase (Capsicum annuum OX=4072)" Length=361	3	Similar to COMT: Caffeic acid 3-O-methyltransferase (Capsicum annuum OX=4072)	SMEL3Ch03:81460304..81463498
F5H	SMEL_003g171370.1.01	70.75	370/523	0.0	788	gene=SMEL_003g171370.1 Name:"Similar to CYP84A1 Cytochrome P450 84A1 (Arabidopsis thaliana OX=3702)" Length=524	3	Similar to CYP84A1: Cytochrome P450 84A1 (Arabidopsis thaliana OX=3702)	SMEL3Ch03:3236901..3240693
HCT	SMEL_003g194560.1.01	78.67	343/436	0.0	717	gene=SMEL_003g194560.1 Name:"Similar to HST Shikimate O-hydroxycinnamoyltransferase (Nicotiana tabacum OX=4097)" Length=435	3	Similar to HST: Shikimate O-hydroxycinnamoyltransferase (Nicotiana tabacum OX=4097)	SMEL3Ch03:91607477..91612491
C3'H	SMEL_001g127960.1.01	85.71	432/504	0.0	914	gene=SMEL_001g127960.1 Name:"Similar to CYP98A2 Cytochrome P450 98A2 (Glycine max OX=3847)" Length=512	1	Similar to CYP98A2: Cytochrome P450 98A2 (Glycine max OX=3847)	SMEL3Ch01:14167115..14170468
	SMEL_010g358590.1.01	74.61	379/508	0.0	827	gene=SMEL_010g358590.1 Name:"Similar to CYP98A2 Cytochrome P450 98A2 (Glycine max OX=3847)" Length=508	10	Similar to CYP98A2: Cytochrome P450 98A2 (Glycine max OX=3847)	SMEL3Ch10:103380160..103383836
HQT	SMEL_007g271440.1.01	89.28	383/429	0.0	795	gene=SMEL_007g271440.1 Name:"Similar to HST Shikimate O-hydroxycinnamoyltransferase (Nicotiana tabacum OX=4097)" Length=427	7	Similar to HST: Shikimate O-hydroxycinnamoyltransferase (Nicotiana tabacum OX=4097)	SMEL3Ch07:562524..566274
	SMEL_012g382640.1.01	74.19	138/186	5e-101	304	gene=SMEL_012g382640.1 Name:"Similar to HST Shikimate O-hydroxycinnamoyltransferase (Nicotiana tabacum OX=4097)" Length=278	12	Similar to HST: Shikimate O-hydroxycinnamoyltransferase (Nicotiana tabacum OX=4097)	SMEL3Ch12:3043850..3045108
CHS	SMEL_005g227980.1.01	85.05	330/388	0.0	680	gene=SMEL_005g227980.1 Name:"Similar to CHS2 Chalcone synthase 2 (Solanum lycopersicum OX=4081)" Length=364	5	Similar to CHS2: Chalcone synthase 2 (Solanum lycopersicum OX=4081)	SMEL3Ch05:5814185..5815848
	SMEL_005g240980.1.01	72.75	275/378	0.0	587	gene=SMEL_005g240980.1 Name:"Similar to CHSJ Chalcone synthase J (Petunia hybrida OX=4102)" Length=386	5	Similar to CHSJ: Chalcone synthase J (Petunia hybrida OX=4102)	SMEL3Ch05:40198743..40200448 (- strand)
	SMEL_005g227740.1.01	71.81	270/376	0.0	585	gene=SMEL_005g227740.1 Name:"Similar to CHSB Chalcone synthase B (Petunia hybrida OX=4102)" Length=392	5	Similar to CHSB: Chalcone synthase B (Petunia hybrida OX=4102)	SMEL3Ch05:5106026..5109123
CHI	SMEL_010g353630.1.01	85.47	200/234	1e-143	402	gene=SMEL_010g353630.1 Name:"Similar to CHI Chalcone--flavonone isomerase (Nicotiana tabacum OX=4097)" Length=234	10	Similar to CHI: Chalcone--flavonone isomerase (Nicotiana tabacum OX=4097)	SMEL3Ch10:96300106..96301916
F3H	Not located (chr. 0)
F3'H	SMEL_003g192460.1.01	91.25	469/514	0.0	946	gene=SMEL_003g192460.1 Name:"Similar to CYP75B2 Flavonoid 3'-monooxygenase (Petunia hybrida OX=4102)" Length=514	3	Similar to CYP75B2: Flavonoid 3'-monooxygenase (Petunia hybrida OX=4102)	SMEL3Ch03:89027600..89036099
F3'5'H	SMEL_012g398880.1.01	88.65	453/511	0.0	919	gene=SMEL_012g398880.1 Name:"Similar to CYP75A2 Flavonoid 3',5'-hydroxylase (Solanum melongena OX=4111)" Length=513	12	Similar to CYP75A2: Flavonoid 3',5'-hydroxylase (Solanum melongena OX=4111)	SMEL3Ch12:99933229..99936856
FLS	SMEL_004g208320.1.01	87.22	307/352	0.0	634	gene=SMEL_004g208320.1 Name:"Similar to Flavonol synthase/flavanone 3-hydroxylase (Solanum tuberosum OX=4113)" Length=349	4	Similar to Flavonol synthase/flavanone 3-hydroxylase (Solanum tuberosum OX=4113)	SMEL3Ch04:54574550..54577478
DFR	Not located (chr. 0)
ANS	SMEL_008g318060.1.01	86.46	364/421	0.0	739	gene=SMEL_008g318060.1 Name:"Similar to ANT17 Leucoanthocyanidin dioxygenase (Petunia hybrida OX=4102)" Length=413	8	Similar to ANT17: Leucoanthocyanidin dioxygenase (Petunia hybrida OX=4102)	SMEL3Ch08:107709697..107711511
ANS	SMEL_008g318020.1.01	80.94	259/320	0.0	545	gene=SMEL_008g318020.1 Name:"Similar to ANT17 Leucoanthocyanidin dioxygenase (Petunia hybrida OX=4102)" Length=419	8	Similar to ANT17: Leucoanthocyanidin dioxygenase (Petunia hybrida OX=4102)	SMEL3Ch08:107702357..107704294
FNS-I	-
FNS-II	-

## Sheet: S1.4 Pepper structural genes
Supplementary Table S1.4 - Annotated putative orthologue genes encoding key enzymes involved in pepper phenylpropanoid pathway retrieved from ITAG4.0 with an e-value threshold of 1·e-10, score >200 and identity >70%.
Enzyme	SubjectId	id%	Aln	evalue	Score	Description	Chr.	Description release 1.55 (CM334)	Position (Mbp)
PAL	CA09g02410	93.75	660/704	0.0	1369	Phenylalanine ammonia-lyaseLength=720	9	"Phenylalanine ammonia-lyase"	Pepper1.55ch09:5685708..5689381
	CA10g12380	88.12	623/707	0.0	1290	Phenylalanine ammonia-lyaseLength=712	10	"Phenylalanine ammonia-lyase"	Pepper1.55ch10:190631163..190634855
	CA05g20790	80.29	558/695	0.0	1159	Phenylalanine ammonia-lyaseLength=716	5	"Phenylalanine ammonia-lyase"	Pepper1.55ch05:233278685..233282647
	CA12g15510	69.43	477/687	0.0	957	Phenylalanine ammonia-lyaseLength=660	12	"Phenylalanine ammonia-lyase"	Pepper1.55ch12:206187584..206191064
	CA09g02420	93.99	313/333	0.0	649	Phenylalanine ammonia-lyaseLength=333	9	"Phenylalanine ammonia-lyase"	Pepper1.55ch09:5700823..5701821
	CA09g02430	90.91	110/121	9e-72	230	Phenylalanine ammonia-lyaseLength=139	9	"Phenylalanine ammonia-lyase"	Pepper1.55ch09:5702892..5703311
C4H	CA06g25940	98.61	498/505	0.0	1025	Cinnamic acid 4-hydroxylaseLength=505	6	"Cinnamic acid 4-hydroxylase"	Pepper1.55ch06:233248785..233251847
	CA06g25930	97.62	493/505	0.0	1017	Cinnamic acid 4-hydroxylaseLength=505	6	"Cinnamic acid 4-hydroxylase"	Pepper1.55ch06:233237826..233241067
4CL	CA03g30500	90.28	492/545	0.0	1030	4-coumarate:coenzyme A ligaseLength=542	3	"4-coumarate:coenzyme A ligase"	Pepper1.55ch03:246787653..246791778
	CA06g17350	88.10	481/546	0.0	997	4-coumarate:coenzyme A ligaseLength=545	6	"4-coumarate:coenzyme A ligase"	Pepper1.55ch06:213549872..213554225
	CA10g04060	74.02	265/358	0.0	538	4-coumarate:coenzyme A ligaseLength=356	10	"4-coumarate:coenzyme A ligase"	Pepper1.55ch10:18570738..18572196
C3H	CA08g09680	78.33	394/503	0.0	839	Putative p-coumarate 3-hydroxylaseLength=496	8	"Putative p-coumarate 3-hydroxylase"	Pepper1.55ch08:127029749..127032335
	CA10g22120	70.47	358/508	0.0	790	CYP98A33v1Length=504	10	"CYP98A33v1"	Pepper1.55ch10:232822691..232827096
COMT	CA03g21160	88.45	291/329	0.0	620	Caffeic acid 3-O-methyltransferaseLength=329	3	"Caffeic acid 3-O-methyltransferase"	Pepper1.55ch03:219918505..219920269
	CA03g21170	99.51	203/204	4e-153	433	Caffeic acid 3-O-methyltransferaseLength=204	3	"Caffeic acid 3-O-methyltransferase"	Pepper1.55ch03:219935313..219936629
	CA03g21100	80.00	164/205	5e-118	344	Caffeic acid 3-O-methyltransferaseLength=205	3	"Caffeic acid 3-O-methyltransferase"	Pepper1.55ch03:219739420..219740833
F5H	CA02g21830	89.27	466/522	0.0	974	CYP84A14v1Length=523	2	"CYP84A14v1"	Pepper1.55ch02:156425051..156428934
HCT	CA03g30250	78.62	342/435	0.0	720	Hydroxycinnamoyl-CoA:quinate hydroxycinnamoyltransferaseLength=435	3	"Hydroxycinnamoyl-CoA:quinate hydroxycinnamoyltransferase"	Pepper1.55ch03:246454590..246459586
C3'H	CA08g09680	82.57	417/505	0.0	877	Putative p-coumarate 3-hydroxylaseLength=496	8	"Putative p-coumarate 3-hydroxylase"	Pepper1.55ch08:127029749..127032335
	CA10g22120	73.03	371/508	0.0	806	CYP98A33v1Length=504	10	"CYP98A33v1"	Pepper1.55ch10:232822691..232827096
HQT	CA07g01790	88.14	379/430	0.0	788	Hydroxycinnamoyl CoA quinate transferaseLength=430	7	"Hydroxycinnamoyl CoA quinate transferase"	Pepper1.55ch07:5933028..5937539
CHS	CA03g02050	96.91	376/388	0.0	784	Chalcone synthaseLength=389	3	"Chalcone synthase"	Pepper1.55ch03:4175408..4177140
	CA05g17060	91.24	354/388	0.0	726	Chalcone synthaseLength=402	5	"Chalcone synthase"	Pepper1.55ch05:224572666..224574782
	CA12g20070	77.13	253/328	0.0	525	Chalcone synthaseLength=336	12	"Chalcone synthase"	Pepper1.55ch12:229978871..229979881
	CA08g19650	74.61	191/256	7e-145	412	Chalcone synthaseLength=265	8	"Chalcone synthase"	Pepper1.55ch08:145074859..145076554
	CA05g17040	83.61	199/238	3e-138	395	Chalcone synthaseLength=246	5	"Chalcone synthase"	Pepper1.55ch05:224437410..224438150
CHI	CA11g02280	79.00	158/200	3e-109	313	Chalcone isomeraseLength=203	11	"Chalcone isomerase"	Pepper1.55ch11:6136843..6139107
F3H	CA02g21550	87.47	321/367	0.0	665	Flavanone 3-hydroxylaseLength=366	2	"Flavanone 3-hydroxylase"	Pepper1.55ch02:156042903..156045459
	CA02g21520	91.98	149/162	1e-112	327	Flavanone 3 beta-hydroxylaseLength=181	2	"Flavanone 3 beta-hydroxylase"	Pepper1.55ch02:155975196..155976141
F3'H	CA03g29350	85.22	369/433	0.0	758	Flavonoid 3'-hydroxylaseLength=418	3	"Flavonoid 3'-hydroxylase"	Pepper1.55ch03:244368220..244373373
F3'5'H	CA11g18550	90.97	413/454	0.0	864	Flavonoid 3',5'-hydroxylaseLength=457	11	"Flavonoid 3',5'-hydroxylase"	Pepper1.55ch11:254751075..254753668
FLS	CA04g08330	85.50	289/338	0.0	607	Flavonol synthaseLength=338	4	"Flavonol synthase"	Pepper1.55ch04:63989290..63992567
	CA09g02570	92.64	151/163	6e-110	319	Flavonol synthaseLength=163	9	"Flavonol synthase"	Pepper1.55ch09:6285290..6286255
	CA09g02560	79.50	128/161	1e-92	276	Flavonol synthaseLength=202	9	"Flavonol synthase"	Pepper1.55ch09:6248047..6248655
DFR	CA02g22270	89.62	328/366	0.0	676	Dihydroflavonol 4-reductaseLength=366	2	"Dihydroflavonol 4-reductase"	Pepper1.55ch02:157248422..157250005
ANS	CA01g03670	85.75	361/421	0.0	733	Anthocyanin synthaseLength=428	1	"Anthocyanin synthase"	Pepper1.55ch01:5813185..5814639
FNS-I
FNS-II	CA06g24300	100.00	521/521	0.0	1075	Flavone synthase IILength=521	6	"Flavone synthase II"	Pepper1.55ch06:230299060..230302341
	CA06g24290	76.15	396/520	0.0	783	Flavone synthase IILength=536	6	"Flavone synthase II"	Pepper1.55ch06:230282295..230288107
