# Supplementary material for: Genetics and breeding of phenolic content in tomato, eggplant and pepper fruits
Source: Front Plant Sci. 2023 Mar 21;14:1135237. doi: 10.3389/fpls.2023.1135237 (PMC10070870; doi:10.3389/fpls.2023.1135237)
Supplement: Supplementary file 2 [file Table_2.xlsx]

## Sheet: QTLs and genes library
Supplementary Data S2 - QTLs associated with phenolic acids, flavonoids (other than anthocyanins) and total phenolics content for tomato, eggplant and pepper. Information regarding the mapping population used, line, QTL type, QTL name, affected metabolite(s), QTL effect, chromosome, location, candidate genes within the QTLs regions and reference is also provided.
Species	Mapping population	Line/Linkage group	QTL type	QTL name	Affected metabolites	QTL effect	Chromosome	Start (cM/Mbp)*	End (cM/Mbp)*	Candidate gene associated	Reference
Tomato	ILs Solanum pennellii (LA0716) x Solanum lycopersicum cv. M82	IL1-1-2	mQTL		Unidentified flavonoid metabolite	7-fold increase	1	2.80 cM	9.00 cM		Alseekh et al. (2015)
Tomato	ILs Solanum pennellii (LA0716) x Solanum lycopersicum cv. M82	IL1-2	mQTL		Unidentified flavonoid metabolite	2-fold increase	1	22.30 cM	92.70 cM		Alseekh et al. (2015)
Tomato	ILs Solanum pennellii (LA0716) x Solanum lycopersicum cv. M82	IL1-2	mQTL		Unidentified phenolic metabolite	3-fold increase	1	22.30 cM	92.70 cM		Alseekh et al. (2015)
Tomato	ILs Solanum pennellii (LA0716) x Solanum lycopersicum cv. M82	IL1-2	mQTL		Unidentified phenolic metabolite	5-fold increase	1	22.30 cM	92.70 cM		Alseekh et al. (2015)
Tomato	ILs Solanum pennellii (LA0716) x Solanum lycopersicum cv. M82	IL1-3	mQTL		Naringenin hexose ll	7-fold increase	1	92.70 cM	142.00 cM		Alseekh et al. (2015)
Tomato	ILs Solanum pennellii (LA0716) x Solanum lycopersicum cv. M82	IL1-3	mQTL		Unidentified hydroxycinnamate metabolite	6-fold increase	1	92.70 cM	142.00 cM		Alseekh et al. (2015)
Tomato	ILs Solanum pennellii (LA0716) x Solanum lycopersicum cv. M82	IL1-3	mQTL		Unidentified phenolic metabolite	9-fold increase	1	92.70 cM	142.00 cM		Alseekh et al. (2015)
Tomato	ILs Solanum pennellii (LA0716) x Solanum lycopersicum cv. M82	IL1-3	mQTL		Unidentified phenolic metabolite	8-fold increase	1	92.70 cM	142.00 cM		Alseekh et al. (2015)
Tomato	ILs Solanum pennellii (LA0716) x Solanum lycopersicum cv. M82	IL1-3	mQTL		Unidentified phenolic metabolite	5-fold increase	1	92.70 cM	142.00 cM		Alseekh et al. (2015)
Tomato	ILs Solanum pennellii (LA0716) x Solanum lycopersicum cv. M82	IL1-4	mQTL		dimethoxyl-4-hydroxyalangifolioside	6-fold increase	1	127.50 cM	165.00 cM		Alseekh et al. (2015)
Tomato	ILs Solanum pennellii (LA0716) x Solanum lycopersicum cv. M82	IL1-4-18	mQTL		Unidentified flavonoid metabolite	0.84-fold	1	129.20 cM	133.30 cM		Alseekh et al. (2015)
Tomato	ILs Solanum pennellii (LA0716) x Solanum lycopersicum cv. M82	IL2-2	mQTL		Unidentified phenolic metabolite	7-fold increase	2	16.20 cM	22.50 cM		Alseekh et al. (2015)
Tomato	ILs Solanum pennellii (LA0716) x Solanum lycopersicum cv. M82	IL2-3	mQTL		Unidentified hydroxycinnamate metabolite	2-fold increase	2	27.60 cM	68.00 cM		Alseekh et al. (2015)
Tomato	ILs Solanum pennellii (LA0716) x Solanum lycopersicum cv. M82	IL2-4	mQTL		Unidentified hydroxycinnamate metabolite	0.40-fold	2	44.8 cM	72.40 cM		Alseekh et al. (2015)
Tomato	ILs Solanum pennellii (LA0716) x Solanum lycopersicum cv. M82	IL2-4	mQTL		Unidentified phenolic metabolite	0.35-fold	2	44.8 cM	72.40 cM		Alseekh et al. (2015)
Tomato	ILs Solanum pennellii (LA0716) x Solanum lycopersicum cv. M82	IL2-5	mQTL		Unidentified flavonoid metabolite	2-fold increase	2	68.00 cM	116.50 cM		Alseekh et al. (2015)
Tomato	ILs Solanum pennellii (LA0716) x Solanum lycopersicum cv. M82	IL2-5	mQTL		p-coumaroylquinic acid	2-fold increase	2	68.00 cM	116.50 cM		Alseekh et al. (2015)
Tomato	ILs Solanum pennellii (LA0716) x Solanum lycopersicum cv. M82	IL2-5	mQTL		Naringenin chalcone	3-fold increase	2	68.00 cM	116.50 cM		Alseekh et al. (2015)
Tomato	ILs Solanum pennellii (LA0716) x Solanum lycopersicum cv. M82	IL2-5	mQTL		Naringenin chalcone hexose I	4-fold increase	2	68.00 cM	116.50 cM		Alseekh et al. (2015)
Tomato	ILs Solanum pennellii (LA0716) x Solanum lycopersicum cv. M82	IL2-6	mQTL		Unidentified flavonoid metabolite	2-fold increase	2	100.50 cM	122.90 cM		Alseekh et al. (2015)
Tomato	ILs Solanum pennellii (LA0716) x Solanum lycopersicum cv. M82	IL2-6-5	mQTL		Unidentified hydroxycinnamate metabolite	2-fold increase	2	137.00 cM	143.00 cM		Alseekh et al. (2015)
Tomato	ILs Solanum pennellii (LA0716) x Solanum lycopersicum cv. M82	IL3-2	mQTL		Unidentified phenolic metabolite	0.07-fold	3	24.2 cM	60.10 cM		Alseekh et al. (2015)
Tomato	ILs Solanum pennellii (LA0716) x Solanum lycopersicum cv. M82	IL3-2	mQTL		Unidentified phenolic metabolite	2-fold increase	3	24.2 cM	60.10 cM		Alseekh et al. (2015)
Tomato	ILs Solanum pennellii (LA0716) x Solanum lycopersicum cv. M82	IL3-2	mQTL		Unidentified hydroxycinnamate metabolite	0.96-fold	3	24.2 cM	60.10 cM		Alseekh et al. (2015)
Tomato	ILs Solanum pennellii (LA0716) x Solanum lycopersicum cv. M82	IL3-4	mQTL		Unidentified phenolic metabolite	4-fold increase	3	64.4 cM	106.20 cM		Alseekh et al. (2015)
Tomato	ILs Solanum pennellii (LA0716) x Solanum lycopersicum cv. M82	IL4-1	mQTL		Unidentified flavonoid metabolite	3-fold increase	4	0.00 cM	32.90 cM		Alseekh et al. (2015)
Tomato	ILs Solanum pennellii (LA0716) x Solanum lycopersicum cv. M82	IL4-1	mQTL		Unidentified hydroxycinnamate metabolite	3-fold increase	4	0.00 cM	32.90 cM		Alseekh et al. (2015)
Tomato	ILs Solanum pennellii (LA0716) x Solanum lycopersicum cv. M82	IL4-1-1	mQTL		Unidentified hydroxycinnamate metabolite	2-fold increase	4	0.00 cM	2.00 cM		Alseekh et al. (2015)
Tomato	ILs Solanum pennellii (LA0716) x Solanum lycopersicum cv. M82	IL4-4	mQTL		Unidentified flavonoid metabolite	2-fold increase	4	100.50 cM	124.40 cM		Alseekh et al. (2015)
Tomato	ILs Solanum pennellii (LA0716) x Solanum lycopersicum cv. M82	IL4-4	mQTL		Unidentified hydroxycinnamate metabolite	0.92-fold	4	100.50 cM	124.40 cM		Alseekh et al. (2015)
Tomato	ILs Solanum pennellii (LA0716) x Solanum lycopersicum cv. M82	IL5-1	mQTL		Unidentified hydroxycinnamate metabolite	0.88-fold	5	0 cM	13.40 cM		Alseekh et al. (2015)
Tomato	ILs Solanum pennellii (LA0716) x Solanum lycopersicum cv. M82	IL5-1	mQTL		Unidentified phenolics metabolite	3-fold increase	5	0 cM	13.40 cM		Alseekh et al. (2015)
Tomato	ILs Solanum pennellii (LA0716) x Solanum lycopersicum cv. M82	IL5-3	mQTL		Coumaric acid hexose I	6-fold increase	5	60.00 cM	102.00 cM		Alseekh et al. (2015)
Tomato	ILs Solanum pennellii (LA0716) x Solanum lycopersicum cv. M82	IL5-4	mQTL		Unidentified flavonoid metabolite	2-fold increase	5	72.70 cM	92.30 cM		Alseekh et al. (2015)
Tomato	ILs Solanum pennellii (LA0716) x Solanum lycopersicum cv. M82	IL5-4	mQTL		Sinapic acid hexose	6-fold increase	5	72.70 cM	92.30 cM		Alseekh et al. (2015)
Tomato	ILs Solanum pennellii (LA0716) x Solanum lycopersicum cv. M82	IL5-4	mQTL		3-(2-hydroxy-4-methoxyphenyl)propanoic acid hexose II	2-fold increase	5	72.70 cM	92.30 cM		Alseekh et al. (2015)
Tomato	ILs Solanum pennellii (LA0716) x Solanum lycopersicum cv. M82	IL5-5	mQTL		Naringenin chalcone	3-fold increase	5	84.90 cM	96.20 cM		Alseekh et al. (2015)
Tomato	ILs Solanum pennellii (LA0716) x Solanum lycopersicum cv. M82	IL5-5	mQTL		Naringenin chalcone hexose I	7-fold increase	5	84.90 cM	96.20 cM		Alseekh et al. (2015)
Tomato	ILs Solanum pennellii (LA0716) x Solanum lycopersicum cv. M82	IL5-5	mQTL		Unidentified hydroxycinnamate metabolite	3-fold increase	5	84.90 cM	96.20 cM		Alseekh et al. (2015)
Tomato	ILs Solanum pennellii (LA0716) x Solanum lycopersicum cv. M82	IL6-1	mQTL		Naringenin chalcone hexose I	9-fold increase	6	0.00 cM	31.80 cM		Alseekh et al. (2015)
Tomato	ILs Solanum pennellii (LA0716) x Solanum lycopersicum cv. M82	IL6-2	mQTL		Caffeoyl-hexose II	0.84-fold	6	25.00 cM	69.60 cM		Alseekh et al. (2015)
Tomato	ILs Solanum pennellii (LA0716) x Solanum lycopersicum cv. M82	IL6-2	mQTL		Unidentified flavonoid metabolite	3-fold increase	6	25.00 cM	69.60 cM		Alseekh et al. (2015)
Tomato	ILs Solanum pennellii (LA0716) x Solanum lycopersicum cv. M82	IL6-2	mQTL		Unidentified hydroxycinnamate metabolite	2-fold increase	6	25.00 cM	69.60 cM		Alseekh et al. (2015)
Tomato	ILs Solanum pennellii (LA0716) x Solanum lycopersicum cv. M82	IL6-2	mQTL		Coumaric acid hexose I	10-fold increase	6	25.00 cM	69.60 cM		Alseekh et al. (2015)
Tomato	ILs Solanum pennellii (LA0716) x Solanum lycopersicum cv. M82	IL6-2	mQTL		Sinapic acid hexose	5-fold increase	6	25.00 cM	69.60 cM		Alseekh et al. (2015)
Tomato	ILs Solanum pennellii (LA0716) x Solanum lycopersicum cv. M82	IL6-2	mQTL		Unidentified phenolic metabolite	2-fold increase	6	25.00 cM	69.60 cM		Alseekh et al. (2015)
Tomato	ILs Solanum pennellii (LA0716) x Solanum lycopersicum cv. M82	IL6-3	mQTL		Unidentified flavonoid metabolite	0.63-fold	6	61.90 cM	99.10 cM		Alseekh et al. (2015)
Tomato	ILs Solanum pennellii (LA0716) x Solanum lycopersicum cv. M82	IL6-3	mQTL		Unidentified flavonoid metabolite	3-fold increase	6	61.90 cM	99.10 cM		Alseekh et al. (2015)
Tomato	ILs Solanum pennellii (LA0716) x Solanum lycopersicum cv. M82	IL6-3	mQTL		Sinapic acid hexose	42-fold increase	6	61.90 cM	99.10 cM		Alseekh et al. (2015)
Tomato	ILs Solanum pennellii (LA0716) x Solanum lycopersicum cv. M82	IL6-3	mQTL		Unidentified hydroxycinnamate metabolite	1-fold increase	6	61.90 cM	99.10 cM	O-methyltransferase (Solyc06g083450), 3-ketoacyl-acyl carrier protein reductases/tropan reductase (Solyc06g083470, Solyc06g083480, and Solyc06g083490), ent-copalyl diphosphate synthase (Solyc06g084240)	Alseekh et al. (2015)
Tomato	ILs Solanum pennellii (LA0716) x Solanum lycopersicum cv. M82	IL6-3	mQTL		Unidentified phenolic metabolite	3-fold increase	6	61.90 cM	99.10 cM	O-methyltransferase (Solyc06g083450), 3-ketoacyl-acyl carrier protein reductases/tropan reductase (Solyc06g083470, Solyc06g083480, and Solyc06g083490), ent-copalyl diphosphate synthase (Solyc06g084240)	Alseekh et al. (2015)
Tomato	ILs Solanum pennellii (LA0716) x Solanum lycopersicum cv. M82	IL6-4	mQTL		Unidentified flavonoid metabolite	2-fold increase	6	89.60 cM	101.00 cM	O-methyltransferase (Solyc06g083450), 3-ketoacyl-acyl carrier protein reductases/tropan reductase (Solyc06g083470, Solyc06g083480, and Solyc06g083490), ent-copalyl diphosphate synthase (Solyc06g084240)	Alseekh et al. (2015)
Tomato	ILs Solanum pennellii (LA0716) x Solanum lycopersicum cv. M82	IL6-4	mQTL		Pregnane derivetive	10-fold increase	6	89.60 cM	101.00 cM	O-methyltransferase (Solyc06g083450), 3-ketoacyl-acyl carrier protein reductases/tropan reductase (Solyc06g083470, Solyc06g083480, and Solyc06g083490), ent-copalyl diphosphate synthase (Solyc06g084240)	Alseekh et al. (2015)
Tomato	ILs Solanum pennellii (LA0716) x Solanum lycopersicum cv. M82	IL7-3	mQTL		Unidentified hydroxycinnamate metabolite	0.39-fold	7	45.50 cM	72.30 cM		Alseekh et al. (2015)
Tomato	ILs Solanum pennellii (LA0716) x Solanum lycopersicum cv. M82	IL7-4	mQTL		Homovanillic acid hexose I	2-fold increase	7	3.00 cM	49.00 cM		Alseekh et al. (2015)
Tomato	ILs Solanum pennellii (LA0716) x Solanum lycopersicum cv. M82	IL7-4	mQTL		1-caffeoylquinic acid I	3-fold increase	7	3.00 cM	49.00 cM		Alseekh et al. (2015)
Tomato	ILs Solanum pennellii (LA0716) x Solanum lycopersicum cv. M82	IL7-4	mQTL		3-(2-hydroxy-4-methoxyphenyl)propanoic acid hexose I	10-fold increase	7	3.00 cM	49.00 cM		Alseekh et al. (2015)
Tomato	ILs Solanum pennellii (LA0716) x Solanum lycopersicum cv. M82	IL7-4	mQTL		Naringenin chalcone hexose I	12-fold increase	7	3.00 cM	49.00 cM		Alseekh et al. (2015)
Tomato	ILs Solanum pennellii (LA0716) x Solanum lycopersicum cv. M82	IL7-4-1	mQTL		1-caffeoylquinic acid I	5-fold increase	7	3.00 cM	36.80 cM		Alseekh et al. (2015)
Tomato	ILs Solanum pennellii (LA0716) x Solanum lycopersicum cv. M82	IL7-4-1	mQTL		3-(2-hydroxy-4-methoxyphenyl)propanoic acid hexose I	6-fold increase	7	3.00 cM	36.80 cM		Alseekh et al. (2015)
Tomato	ILs Solanum pennellii (LA0716) x Solanum lycopersicum cv. M82	IL7-4-1	mQTL		Increased ferulic acid hexose II	3-fold increase	7	3.00 cM	36.80 cM		Alseekh et al. (2015)
Tomato	ILs Solanum pennellii (LA0716) x Solanum lycopersicum cv. M82	IL7-4-1	mQTL		Unidentified phenolic metabolite	3-fold increase	7	3.00 cM	36.80 cM		Alseekh et al. (2015)
Tomato	ILs Solanum pennellii (LA0716) x Solanum lycopersicum cv. M82	IL7-5	mQTL		Unidentified phenolic metabolite	4-fold increase	7	0.00 cM	21.00 cM		Alseekh et al. (2015)
Tomato	ILs Solanum pennellii (LA0716) x Solanum lycopersicum cv. M82	IL7-5	mQTL		Unidentified phenolic metabolite	6-fold increase	7	0.00 cM	21.00 cM		Alseekh et al. (2015)
Tomato	ILs Solanum pennellii (LA0716) x Solanum lycopersicum cv. M82	IL7-5-5	mQTL		Unidentified flavonoid metabolite	2-fold increase	7	0.00 cM	50.00 cM		Alseekh et al. (2015)
Tomato	ILs Solanum pennellii (LA0716) x Solanum lycopersicum cv. M82	IL7-5-5	mQTL		Unidentified phenolic metabolite	6-fold increase	7	0.00 cM	50.00 cM		Alseekh et al. (2015)
Tomato	ILs Solanum pennellii (LA0716) x Solanum lycopersicum cv. M82	IL7-5-5	mQTL		Unidentified phenolic metabolite	7-fold increase	7	0.00 cM	50.00 cM		Alseekh et al. (2015)
Tomato	ILs Solanum pennellii (LA0716) x Solanum lycopersicum cv. M82	IL8-1	mQTL		Sinapic acid hexose	11-fold increase	8	2.00 cM	36.70 cM		Alseekh et al. (2015)
Tomato	ILs Solanum pennellii (LA0716) x Solanum lycopersicum cv. M82	IL8-1-1	mQTL		Unidentified hydroxycinnamate metabolite	0.48-fold	8	2.00 cM	22.00 cM		Alseekh et al. (2015)
Tomato	ILs Solanum pennellii (LA0716) x Solanum lycopersicum cv. M82	IL8-1-1	mQTL		Sinapic acid hexose	10-fold increase	8	2.00 cM	22.00 cM		Alseekh et al. (2015)
Tomato	ILs Solanum pennellii (LA0716) x Solanum lycopersicum cv. M82	IL8-1-3	mQTL		Increased sinapic acid hexose	11-fold increase	8	Possible mistake in the naming of this IL. Could be IL8-3-1 or IL8-1-5			Alseekh et al. (2015)
Tomato	ILs Solanum pennellii (LA0716) x Solanum lycopersicum cv. M82	IL8-2	mQTL		Caffeoyl-hexose III	0.18-fold	8	20.10 cM	74.50 cM		Alseekh et al. (2015)
Tomato	ILs Solanum pennellii (LA0716) x Solanum lycopersicum cv. M82	IL8-2	mQTL		Sinapic acid hexose	27-fold increase	8	20.10 cM	74.50 cM		Alseekh et al. (2015)
Tomato	ILs Solanum pennellii (LA0716) x Solanum lycopersicum cv. M82	IL8-2	mQTL		Unidentified hydroxycinnamate metabolite	10-fold increase	8	20.10 cM	74.50 cM		Alseekh et al. (2015)
Tomato	ILs Solanum pennellii (LA0716) x Solanum lycopersicum cv. M82	IL8-2	mQTL		NGC-hexose, -pentose	6-fold increase	8	20.10 cM	74.50 cM		Alseekh et al. (2015)
Tomato	ILs Solanum pennellii (LA0716) x Solanum lycopersicum cv. M82	IL8-2	mQTL		3-(2-hydroxy-4-methoxyphenyl)propanoic acid hexose II	15-fold increase	8	20.10 cM	74.50 cM		Alseekh et al. (2015)
Tomato	ILs Solanum pennellii (LA0716) x Solanum lycopersicum cv. M82	IL8-2	mQTL		Unidentified phenolic metabolite	4-fold increase	8	20.10 cM	74.50 cM		Alseekh et al. (2015)
Tomato	ILs Solanum pennellii (LA0716) x Solanum lycopersicum cv. M82	IL8-2	mQTL		Unidentified phenolic metabolite	5-fold increase	8	20.10 cM	74.50 cM		Alseekh et al. (2015)
Tomato	ILs Solanum pennellii (LA0716) x Solanum lycopersicum cv. M82	IL8-2	mQTL		Homovanillic acid hexose II	63-fold increase	8	20.10 cM	74.50 cM		Alseekh et al. (2015)
Tomato	ILs Solanum pennellii (LA0716) x Solanum lycopersicum cv. M82	IL8-2	mQTL		Unidentified hydroxycinnamate metabolite	65-fold increase	8	20.10 cM	74.50 cM		Alseekh et al. (2015)
Tomato	ILs Solanum pennellii (LA0716) x Solanum lycopersicum cv. M82	IL8-2	mQTL		Unidentified phenolic metabolite	17-fold increase	8	20.10 cM	74.50 cM		Alseekh et al. (2015)
Tomato	ILs Solanum pennellii (LA0716) x Solanum lycopersicum cv. M82	IL8-2	mQTL		Unidentified phenolic metabolite	10-fold increase	8	20.10 cM	74.50 cM		Alseekh et al. (2015)
Tomato	ILs Solanum pennellii (LA0716) x Solanum lycopersicum cv. M82	IL8-2-1	mQTL		Homovanillic acid hexose I	0.18-fold	8	23.50 cM	50.50 cM		Alseekh et al. (2015)
Tomato	ILs Solanum pennellii (LA0716) x Solanum lycopersicum cv. M82	IL8-2-1	mQTL		Sinapic acid hexose	19-fold increase	8	23.50 cM	50.50 cM		Alseekh et al. (2015)
Tomato	ILs Solanum pennellii (LA0716) x Solanum lycopersicum cv. M82	IL8-2-1	mQTL		3-(2-hydroxy-4-methoxyphenyl)propanoic acid hexose II	8-fold increase	8	23.50 cM	50.50 cM		Alseekh et al. (2015)
Tomato	ILs Solanum pennellii (LA0716) x Solanum lycopersicum cv. M82	IL8-2-1	mQTL		Homovanillic acid hexose II	81-fold increase	8	23.50 cM	50.50 cM		Alseekh et al. (2015)
Tomato	ILs Solanum pennellii (LA0716) x Solanum lycopersicum cv. M82	IL8-2-1	mQTL		Unidentified phenolic metabolite	3-fold increase	8	23.50 cM	50.50 cM		Alseekh et al. (2015)
Tomato	ILs Solanum pennellii (LA0716) x Solanum lycopersicum cv. M82	IL8-2-1	mQTL		Unidentified phenolic metabolite	4-fold increase	8	23.50 cM	50.50 cM		Alseekh et al. (2015)
Tomato	ILs Solanum pennellii (LA0716) x Solanum lycopersicum cv. M82	IL8-2-1	mQTL		Unidentified phenolic metabolite	6-fold increase	8	23.50 cM	50.50 cM		Alseekh et al. (2015)
Tomato	ILs Solanum pennellii (LA0716) x Solanum lycopersicum cv. M82	IL8-2-1	mQTL		Unidentified phenolic metabolite	9-fold increase	8	23.50 cM	50.50 cM		Alseekh et al. (2015)
Tomato	ILs Solanum pennellii (LA0716) x Solanum lycopersicum cv. M82	IL8-2-1	mQTL		Unidentified hydroxycinnamate metabolite	26-fold increase	8	23.50 cM	50.50 cM		Alseekh et al. (2015)
Tomato	ILs Solanum pennellii (LA0716) x Solanum lycopersicum cv. M82	IL9-1	mQTL		Unidentified flavonoid metabolite	2-fold increase	9	0.00 cM	44.80 cM		Alseekh et al. (2015)
Tomato	ILs Solanum pennellii (LA0716) x Solanum lycopersicum cv. M82	IL9-1	mQTL		Unidentified flavonoid metabolite	2-fold increase	9	0.00 cM	44.80 cM		Alseekh et al. (2015)
Tomato	ILs Solanum pennellii (LA0716) x Solanum lycopersicum cv. M82	IL9-1	mQTL		Sinapic acid hexose	4-fold increase	9	0.00 cM	44.80 cM		Alseekh et al. (2015)
Tomato	ILs Solanum pennellii (LA0716) x Solanum lycopersicum cv. M82	IL9-1	mQTL		Unidentified phenolic metabolite	2-fold increase	9	0.00 cM	44.80 cM		Alseekh et al. (2015)
Tomato	ILs Solanum pennellii (LA0716) x Solanum lycopersicum cv. M82	IL9-1-2	mQTL		Unidentified hydroxycinnamate metabolite	2-fold increase	9	0.00 cM	23.00 cM		Alseekh et al. (2015)
Tomato	ILs Solanum pennellii (LA0716) x Solanum lycopersicum cv. M82	IL9-1-3	mQTL		Unidentified hydroxycinnamate metabolite	0.44-fold	9	8.90 cM	44.80 cM		Alseekh et al. (2015)
Tomato	ILs Solanum pennellii (LA0716) x Solanum lycopersicum cv. M82	IL9-1-3	mQTL		Unidentified flavonoid metabolite	3-fold increase	9	8.90 cM	44.80 cM		Alseekh et al. (2015)
Tomato	ILs Solanum pennellii (LA0716) x Solanum lycopersicum cv. M82	IL9-2	mQTL		Unidentified flavonoid metabolite	2-fold increase	9	28.90 cM	66.10 cM		Alseekh et al. (2015)
Tomato	ILs Solanum pennellii (LA0716) x Solanum lycopersicum cv. M82	IL9-2	mQTL		Unidentified phenolic metabolite	3-fold increase	9	28.90 cM	66.10 cM		Alseekh et al. (2015)
Tomato	ILs Solanum pennellii (LA0716) x Solanum lycopersicum cv. M82	IL9-2-5	mQTL		Unidentified hydroxycinnamate metabolite	0.96-fold	9	28.00 cM	35.00 cM		Alseekh et al. (2015)
Tomato	ILs Solanum pennellii (LA0716) x Solanum lycopersicum cv. M82	IL9-3	mQTL		Unidentified hydroxycinnamate metabolite	0.3-fold	9	25.00 cM	109.10 cM		Alseekh et al. (2015)
Tomato	ILs Solanum pennellii (LA0716) x Solanum lycopersicum cv. M82	IL9-3	mQTL		Unidentified phenolic metabolites	2-fold increase	9	25.00 cM	109.10 cM		Alseekh et al. (2015)
Tomato	ILs Solanum pennellii (LA0716) x Solanum lycopersicum cv. M82	IL9-3	mQTL		Unidentified phenolic metabolites	3-fold increase	9	25.00 cM	109.10 cM		Alseekh et al. (2015)
Tomato	ILs Solanum pennellii (LA0716) x Solanum lycopersicum cv. M82	IL10-1	mQTL		Caffeoyl-hexose I	3-fold increase	10	0.00 cM	37.30 cM		Alseekh et al. (2015)
Tomato	ILs Solanum pennellii (LA0716) x Solanum lycopersicum cv. M82	IL10-1	mQTL		1-caffeoylquinic acid I	5-fold increase	10	0.00 cM	37.30 cM		Alseekh et al. (2015)
Tomato	ILs Solanum pennellii (LA0716) x Solanum lycopersicum cv. M82	IL10-1	mQTL		Coumaric acid hexose I	13-fold increase	10	0.00 cM	37.30 cM		Alseekh et al. (2015)
Tomato	ILs Solanum pennellii (LA0716) x Solanum lycopersicum cv. M82	IL10-1	mQTL		Naringenin chalcone hexose I	5-fold increase	10	0.00 cM	37.30 cM		Alseekh et al. (2015)
Tomato	ILs Solanum pennellii (LA0716) x Solanum lycopersicum cv. M82	IL10-1-1	mQTL		Naringenin chalcone	5-fold increase	10	0.00 cM	12.00 cM		Alseekh et al. (2015)
Tomato	ILs Solanum pennellii (LA0716) x Solanum lycopersicum cv. M82	IL10-2	mQTL		Unidentified flavonoid metabolite	5-fold increase	10	34.60 cM	75.10 cM		Alseekh et al. (2015)
Tomato	ILs Solanum pennellii (LA0716) x Solanum lycopersicum cv. M82	IL10-2	mQTL		Unidentified hydroxycinnamate metabolite	1-fold increase	10	34.60 cM	75.10 cM		Alseekh et al. (2015)
Tomato	ILs Solanum pennellii (LA0716) x Solanum lycopersicum cv. M82	IL10-2	mQTL		Unidentified hydroxycinnamate metabolite	3-fold increase	10	34.60 cM	75.10 cM		Alseekh et al. (2015)
Tomato	ILs Solanum pennellii (LA0716) x Solanum lycopersicum cv. M82	IL10-2	mQTL		Homovanillic acid hexose II	3-fold increase	10	34.60 cM	75.10 cM		Alseekh et al. (2015)
Tomato	ILs Solanum pennellii (LA0716) x Solanum lycopersicum cv. M82	IL10-2	mQTL		Unidentified phenolic metabolite	3-fold increase	10	34.60 cM	75.10 cM		Alseekh et al. (2015)
Tomato	ILs Solanum pennellii (LA0716) x Solanum lycopersicum cv. M82	IL10-2	mQTL		Unidentified phenolic metabolite	8-fold increase	10	34.60 cM	75.10 cM		Alseekh et al. (2015)
Tomato	ILs Solanum pennellii (LA0716) x Solanum lycopersicum cv. M82	IL10-3	mQTL		Caffeoyl-hexose I	3-fold increase	10	61.50 cM	86.00 cM	UGT1 genes (Solyc10g085730, Solyc10g085860, Solyc10g085870, Solyc10g085880, Solyc10g086240), phenylalanine ammonia lyase (PAL; Solyc10g086180)	Alseekh et al. (2015)
Tomato	ILs Solanum pennellii (LA0716) x Solanum lycopersicum cv. M82	IL10-3	mQTL		Caffeoyl-hexose II	0.88-fold	10	61.50 cM	86.00 cM	UGT1 genes (Solyc10g085730, Solyc10g085860, Solyc10g085870, Solyc10g085880, Solyc10g086240), phenylalanine ammonia lyase (PAL; Solyc10g086180)	Alseekh et al. (2015)
Tomato	ILs Solanum pennellii (LA0716) x Solanum lycopersicum cv. M82	IL10-3	mQTL		Homovanillic acid hexose I	16-fold increase	10	61.50 cM	86.00 cM	UGT1 genes (Solyc10g085730, Solyc10g085860, Solyc10g085870, Solyc10g085880, Solyc10g086240), phenylalanine ammonia lyase (PAL; Solyc10g086180)	Alseekh et al. (2015)
Tomato	ILs Solanum pennellii (LA0716) x Solanum lycopersicum cv. M82	IL10-3	mQTL		Coumaric acid hexose I	19-fold increase	10	61.50 cM	86.00 cM	UGT1 genes (Solyc10g085730, Solyc10g085860, Solyc10g085870, Solyc10g085880, Solyc10g086240), phenylalanine ammonia lyase (PAL; Solyc10g086180)	Alseekh et al. (2015)
Tomato	ILs Solanum pennellii (LA0716) x Solanum lycopersicum cv. M82	IL10-3	mQTL		Homovanillic acid hexose II	8-fold increase	10	61.50 cM	86.00 cM	UGT1 genes (Solyc10g085730, Solyc10g085860, Solyc10g085870, Solyc10g085880, Solyc10g086240), phenylalanine ammonia lyase (PAL; Solyc10g086180)	Alseekh et al. (2015)
Tomato	ILs Solanum pennellii (LA0716) x Solanum lycopersicum cv. M82	IL10-3	mQTL		Coumaric acid hexose III	5-fold increase	10	61.50 cM	86.00 cM	UGT1 genes (Solyc10g085730, Solyc10g085860, Solyc10g085870, Solyc10g085880, Solyc10g086240), phenylalanine ammonia lyase (PAL; Solyc10g086180)	Alseekh et al. (2015)
Tomato	ILs Solanum pennellii (LA0716) x Solanum lycopersicum cv. M82	IL10-3	mQTL		Coumaric acid hexose III	15-fold increase	10	61.50 cM	86.00 cM	UGT1 genes (Solyc10g085730, Solyc10g085860, Solyc10g085870, Solyc10g085880, Solyc10g086240), phenylalanine ammonia lyase (PAL; Solyc10g086180)	Alseekh et al. (2015)
Tomato	ILs Solanum pennellii (LA0716) x Solanum lycopersicum cv. M82	IL11-1	mQTL		Unidentified flavonoid metabolite	1-fold increase	11	0.00 cM	27.20 cM		Alseekh et al. (2015)
Tomato	ILs Solanum pennellii (LA0716) x Solanum lycopersicum cv. M82	IL11-2	mQTL		Unidentified phenolic metabolite	12-fold increase	11	20.50 cM	57.00 cM		Alseekh et al. (2015)
Tomato	ILs Solanum pennellii (LA0716) x Solanum lycopersicum cv. M82	IL11-2	mQTL		Unidentified hydroxycinnamate metabolite	2-fold increase	11	20.50 cM	57.00 cM		Alseekh et al. (2015)
Tomato	ILs Solanum pennellii (LA0716) x Solanum lycopersicum cv. M82	IL11-3	mQTL		Unidentified phenolics metabolite	9-fold increase	11	45.40 cM	92.00 cM		Alseekh et al. (2015)
Tomato	ILs Solanum pennellii (LA0716) x Solanum lycopersicum cv. M82	IL11-4	mQTL		NGC-hexose, -pentose	3-fold increase	11	79.90 cM	88.50 cM		Alseekh et al. (2015)
Tomato	ILs Solanum pennellii (LA0716) x Solanum lycopersicum cv. M82	IL11-4	mQTL		Unidentified hydroxycinnamate metabolite	3-fold increase	11	79.90 cM	88.50 cM		Alseekh et al. (2015)
Tomato	ILs Solanum pennellii (LA0716) x Solanum lycopersicum cv. M82	IL11-4-1	mQTL		Naringenin hexose II	6-fold increase	11	83.80 cM	88.50 cM		Alseekh et al. (2015)
Tomato	ILs Solanum pennellii (LA0716) x Solanum lycopersicum cv. M82	IL11-4-1	mQTL		Unidentified hydroxycinnamate metabolite	3-fold increase	11	83.80 cM	88.50 cM		Alseekh et al. (2015)
Tomato	ILs Solanum pennellii (LA0716) x Solanum lycopersicum cv. M82	IL11-4-1	mQTL		Unidentified phenolic metabolite	3-fold increase	11	83.80 cM	88.50 cM		Alseekh et al. (2015)
Tomato	ILs Solanum pennellii (LA0716) x Solanum lycopersicum cv. M82	IL12-1	mQTL		Unidentified hydroxycinnamate metabolite	2-fold increase	12	9.00 cM	21.00 cM		Alseekh et al. (2015)
Tomato	ILs Solanum pennellii (LA0716) x Solanum lycopersicum cv. M82	IL12-2	mQTL		Caffeoyl-hexose III	0.25-fold	12	9.00 cM	66.00 cM		Alseekh et al. (2015)
Tomato	ILs Solanum pennellii (LA0716) x Solanum lycopersicum cv. M82	IL12-2	mQTL		Unidentified hydroxycinnamate metabolite	0.39-fold	12	9.00 cM	66.00 cM		Alseekh et al. (2015)
Tomato	ILs Solanum pennellii (LA0716) x Solanum lycopersicum cv. M82	IL12-2	mQTL		Unidentified hydroxycinnamate metabolite	2-fold increase	12	9.00 cM	66.00 cM		Alseekh et al. (2015)
Tomato	ILs Solanum pennellii (LA0716) x Solanum lycopersicum cv. M82	IL12-4	mQTL		Unidentified hydroxycinnamate metabolite	2-fold increase	12	66.00 cM	120.00 cM	MYB genes (Solyc12g099130, Solyc12g099120, Solyc12g099140, Solyc12g099620, Solyc12g099850)	Alseekh et al. (2015)
Tomato	ILs Solanum pennellii (LA0716) x Solanum lycopersicum cv. M82	IL12-4	mQTL		Unidentified hydroxycinnamate metabolite	2-fold increase	12	66.00 cM	120.00 cM	MYB genes (Solyc12g099130, Solyc12g099120, Solyc12g099140, Solyc12g099620, Solyc12g099850)	Alseekh et al. (2015)
Tomato	ILs Solanum pennellii (LA0716) x Solanum lycopersicum cv. M82	IL12-4-1	mQTL		Unidentified phenolic metabolite	3-fold increase	12	117.00 cM	120.00 cM	MYB genes (Solyc12g099130, Solyc12g099120, Solyc12g099140, Solyc12g099620, Solyc12g099850)	Alseekh et al. (2015)
Tomato	ILs Solanum pennellii (LA0716) x Solanum lycopersicum cv. M82	IL 3-2	QTL	phe3-2	Total phenolics	30-50% decrease	3	24.2 cM	60.10 cM		Rousseaux et al. (2005)
Tomato	ILs Solanum pennellii (LA0716) x Solanum lycopersicum cv. M82	IL 3-3	QTL	phe3-3	Total phenolics	30-50% decrease	3	51.50 cM	92.30 cM		Rousseaux et al. (2005)
Tomato	ILs Solanum pennellii (LA0716) x Solanum lycopersicum cv. M82	IL 3-4	QTL	phe3-4	Total phenolics	30-50% decrease	3	64.4 cM	106.20 cM		Rousseaux et al. (2005)
Tomato	ILs Solanum pennellii (LA0716) x Solanum lycopersicum cv. M82	IL 5-4	QTL	phe5-4	Total phenolics	30-50% decrease	5	72.70 cM	92.30 cM		Rousseaux et al. (2005)
Tomato	ILs Solanum pennellii (LA0716) x Solanum lycopersicum cv. M82	IL 6-2 (bin 6-E)	QTL	phe6-2	Total phenolics	40% increase	6	64.00 cM	80.00 cM		Rousseaux et al. (2005)
Tomato	ILs Solanum pennellii (LA0716) x Solanum lycopersicum cv. M82	IL 7-2	QTL	phe7-2	Total phenolics	30-50% decrease	7	45.50 cM	97.00 cM		Rousseaux et al. (2005)
Tomato	ILs Solanum pennellii (LA0716) x Solanum lycopersicum cv. M82	IL 7-4 (bin 7-D)	QTL	phe7-4	Total phenolics	605 increase	7	9.00 cM	38.50 cM		Rousseaux et al. (2005)
Tomato	ILs Solanum pennellii (LA0716) x Solanum lycopersicum cv. M82	IL 8-2	QTL	phe8-2	Total phenolics	30-50% decrease	8	20.10 cM	74.50 cM		Rousseaux et al. (2005)
Tomato	ILs Solanum pennellii (LA0716) x Solanum lycopersicum cv. M82	IL 9-1	QTL	phe9-1	Total phenolics	30-50% decrease	9	0.00 cM	44.80 cM		Rousseaux et al. (2005)
Tomato	ILs Solanum pennellii (LA0716) x Solanum lycopersicum cv. M82	IL7-3	QTL	phe7-3	Total phenolics	50% increase	7	38.50 cM	64.00/98.60 cM		Sacco et al. (2013)
Tomato	ILs Solanum pennellii (LA0716) x Solanum lycopersicum cv. M82	IL7-3	QTL	phe7-3	Total phenolics	50% increase	7	38.50 cM	64.00/98.60 cM		Di Matteo et al. (2010)
Tomato	ILs Solanum pennellii (LA0716) x Solanum lycopersicum cv. M82	IL7-3	QTL	phe7-3	Total phenolics	50% increase	7	38.50 cM	64.00/98.60 cM	Solyc10g081260 (MATE, Multidrug resistance protein), Solyc06g005080 (VSP, Vacuolar protein sorting-associated protein 18), Solyc07g056420 and Solyc07g056510 (GST, Glutathione S-transferase), Solyc05g051200 (ERF1, Ethylene Responsive Factor 1)	Di Matteo et al. (2013)
Tomato	BILs and ILs Solanum pennellii (LA0716) x Solanum lycopersicum cv. M82	bin 19 (Lines 6645, IL 1-2, IL 1-1)	mQTL hotspot (breaker stage)		Naringenin, 3′,5′-di-C-glucosylphloretin	decrease	1	4.62 Mbp	83.13 Mbp		Szymański et al. (2020)
Tomato	BILs and ILs Solanum pennellii (LA0716) x Solanum lycopersicum cv. M82	bin 42 (Lines 6673, 6692, 6223b, IL 1-3, 6329, 6588)	mQTL (red ripe stage)		Kaempferol feruloyl dihexose-deoxyhexoside	increase	1	91.47 Mbp	91.57 Mbp		Szymański et al. (2020)
Tomato	BILs and ILs Solanum pennellii (LA0716) x Solanum lycopersicum cv. M82	bin 42 (Lines 6673, 6692, 6223b, IL 1-3, 6329, 6588)	mQTL (red ripe stage)		3,4- or 3,5-dicaffeoylquinic acid	decrease	1	91.47 Mbp	91.57 Mbp		Szymański et al. (2020)
Tomato	BILs and ILs Solanum pennellii (LA0716) x Solanum lycopersicum cv. M82	bin 182 (Lines 6181, 6432, 6306, 6704, 6598, 6679, 6595, IL 2-5, 6222b, 6650, 6580, 6418, 6624, 6406, IL 2-6, 6677, 6328, 6504, 6250, 6315, 6453, 6514, 6668, 6672, 6625, 6401, 6525, 6321, 6436, 6405, 6686, 6680, 6590, 6661, 6662, 6640, 6322, 6576)	mQTL (red ripe stage)		3-caffeoylquinic acid	decrease	2	54.44 Mbp	54.46 Mbp		Szymański et al. (2020)
Tomato	BILs and ILs Solanum pennellii (LA0716) x Solanum lycopersicum cv. M82	bin 424 (Lines 6274, 6491, 6601, 6502b, 6677, 6502a, 6504, 6315, 6514, 6271, 6301, 6344, 6505, 6485, 6550, 6519, 6382, 6265, 6253)	mQTL hotspot (breaker stage)		4 flavonoids	increase	5	4.31 Mbp	4.70 Mbp		Szymański et al. (2020)
Tomato	BILs and ILs Solanum pennellii (LA0716) x Solanum lycopersicum cv. M82	bin 424 (Lines 6274, 6491, 6601, 6502b, 6677, 6502a, 6504, 6315, 6514, 6271, 6301, 6344, 6505, 6485, 6550, 6519, 6382, 6265, 6253)	mQTL hotspot (breaker stage)		2 flavonoids	decrease	5	4.31 Mbp	4.70 Mbp		Szymański et al. (2020)
Tomato	BILs and ILs Solanum pennellii (LA0716) x Solanum lycopersicum cv. M82	bin 424 (Lines 6274, 6491, 6601, 6502b, 6677, 6502a, 6504, 6315, 6514, 6271, 6301, 6344, 6505, 6485, 6550, 6519, 6382, 6265, 6253)	mQTL hotspot (red ripe stage)		5 flavonoids	increase	5	4.31 Mbp	4.70 Mbp		Szymański et al. (2020)
Tomato	BILs and ILs Solanum pennellii (LA0716) x Solanum lycopersicum cv. M82	bin 424 (Lines 6274, 6491, 6601, 6502b, 6677, 6502a, 6504, 6315, 6514, 6271, 6301, 6344, 6505, 6485, 6550, 6519, 6382, 6265, 6253)	mQTL hotspot (red ripe stage)		22 flavonoids	decrease	5	4.31 Mbp	4.70 Mbp		Szymański et al. (2020)
Tomato	BILs and ILs Solanum pennellii (LA0716) x Solanum lycopersicum cv. M82	bin 842 (Lines 6212b, 6292, 6220a, 6397, 6582, 6593, 6293, 6638, 6567, 6594, IL 9-2, IL 9-3)	mQTL (breaker stage)		3′,5′-di-C-glucosylphloretin	increase	9	60.69 Mbp	60.93 Mbp		Szymański et al. (2020)
Tomato	BILs and ILs Solanum pennellii (LA0716) x Solanum lycopersicum cv. M82	bin 842 (Lines 6212b, 6292, 6220a, 6397, 6582, 6593, 6293, 6638, 6567, 6594, IL 9-2, IL 9-3)	mQTL (red ripe stage)		3′,5′-di-C-glucosylphloretin	increase	9	60.69 Mbp	60.93 Mbp		Szymański et al. (2020)
Tomato	BILs and ILs Solanum pennellii (LA0716) x Solanum lycopersicum cv. M82	bin 1019 (Lines 6432, 6617, IL 10-3, 6557, 6404, 6176, 6559, 6642, 6504, 6384, 6170, 6514, 6271, 6254, 6681, 6400, 6579, 6309, 6555, 6286, 6385, 6567, 6422, 6288, 6560, 6680, 6590, 6433, 6519, 6172, 6572, 6443, 6276, 6565, 6387, 6277)	mQTL (red ripe stage)		4-O-β-D-glucosyl-4-coumaric acid	increase	10	65.06 Mbp	65.09 Mbp		Szymański et al. (2020)
Tomato	ILs Solanum chmielewskii (LA1840) x Solanum lycopersicum cv. Moneyberg	IL2b	QTL		Quercetin feruloyl deoxyhexose-dihexose	3.6-fold increase	2	1.00 Mbp	37.72 Mbp		Ballester et al. (2016)
Tomato	ILs Solanum chmielewskii (LA1840) x Solanum lycopersicum cv. Moneyberg	IL2d	QTL		Kaempferol 3-O-rutinoside	1.7-fold increase	2	36.57 Mbp	41.80 Mbp		Ballester et al. (2016)
Tomato	ILs Solanum chmielewskii (LA1840) x Solanum lycopersicum cv. Moneyberg	IL3c	QTL		Phloridzin-C-diglucoside	1.5-fold increase	3/9	53.95 Mbp/66.71 Mbp	62.89 Mbp/67.61 Mbp		Ballester et al. (2016)
Tomato	ILs Solanum chmielewskii (LA1840) x Solanum lycopersicum cv. Moneyberg	IL3c	QTL		Coumaric acid-hexose isomer I	2.6-fold increase	3/9	53.95 Mbp/66.71 Mbp	62.89 Mbp/67.61 Mbp		Ballester et al. (2016)
Tomato	ILs Solanum chmielewskii (LA1840) x Solanum lycopersicum cv. Moneyberg	IL4d	QTL		3,4,5-Tricaffeoylquinic acid	2.1-fold increase	4/10	59.42 Mbp/1.00 Mbp	64.06 Mbp/2.53 Mbp		Ballester et al. (2016)
Tomato	ILs Solanum chmielewskii (LA1840) x Solanum lycopersicum cv. Moneyberg	IL4d	QTL		3-Caffeoylquinic acid (Chlorogenic acid)	1.4-fold increase	4/10	59.42 Mbp/1.00 Mbp	64.06 Mbp/2.53 Mbp		Ballester et al. (2016)
Tomato	ILs Solanum chmielewskii (LA1840) x Solanum lycopersicum cv. Moneyberg	IL4d	QTL		4-Caffeoylquinic acid	2.3-fold increase	4/10	59.42 Mbp/1.00 Mbp	64.06 Mbp/2.53 Mbp		Ballester et al. (2016)
Tomato	ILs Solanum chmielewskii (LA1840) x Solanum lycopersicum cv. Moneyberg	IL4d	QTL		Quercetin 3-O-rutinoside-7-O-glucoside	3.3-fold increase	4/10	59.42 Mbp/1.00 Mbp	64.06 Mbp/2.53 Mbp		Ballester et al. (2016)
Tomato	ILs Solanum chmielewskii (LA1840) x Solanum lycopersicum cv. Moneyberg	IL4d	QTL		Quercetine 3-O-glucoside	3.4-fold increase	4/10	59.42 Mbp/1.00 Mbp	64.06 Mbp/2.53 Mbp		Ballester et al. (2016)
Tomato	ILs Solanum chmielewskii (LA1840) x Solanum lycopersicum cv. Moneyberg	IL4d	QTL		Kaempferol 3-O-rutinoside-7-O-glucoside	5.4-fold increase	4/10	59.42 Mbp/1.00 Mbp	64.06 Mbp/2.53 Mbp		Ballester et al. (2016)
Tomato	ILs Solanum chmielewskii (LA1840) x Solanum lycopersicum cv. Moneyberg	IL4d	QTL		Kaempferol 3-O-rutinoside	2.7-fold increase	4/10	59.42 Mbp/1.00 Mbp	64.06 Mbp/2.53 Mbp		Ballester et al. (2016)
Tomato	ILs Solanum chmielewskii (LA1840) x Solanum lycopersicum cv. Moneyberg	IL5b	QTL		Quercetin 3-O-rutinoside-7-O-glucoside	2.2-fold increase	5/4	1.00 Mbp/1.72 Mbp	4.76 Mbp/2.28 Mbp	Solyc05g010320 (CHI1, naringenin chalcone isomerase 1)	Ballester et al. (2016)
Tomato	ILs Solanum chmielewskii (LA1840) x Solanum lycopersicum cv. Moneyberg	IL5b	QTL		Quercetin 3-O-glucoside	17.2-fold increase	5/4	1.00 Mbp/1.72 Mbp	4.76 Mbp/2.28 Mbp	Solyc05g010320 (CHI1, naringenin chalcone isomerase 1)	Ballester et al. (2016)
Tomato	ILs Solanum chmielewskii (LA1840) x Solanum lycopersicum cv. Moneyberg	IL5b	QTL		Kaempferol 3-O-rutinoside-7-O-glucoside	16.2-fold increase	5/4	1.00 Mbp/1.72 Mbp	4.76 Mbp/2.28 Mbp	Solyc05g010320 (CHI1, naringenin chalcone isomerase 1)	Ballester et al. (2016)
Tomato	ILs Solanum chmielewskii (LA1840) x Solanum lycopersicum cv. Moneyberg	IL5b	QTL		Kaempferol 3-O-rutinoside	8.6-fold increase	5/4	1.00 Mbp/1.72 Mbp	4.76 Mbp/2.28 Mbp	Solyc05g010320 (CHI1, naringenin chalcone isomerase 1)	Ballester et al. (2016)
Tomato	ILs Solanum chmielewskii (LA1840) x Solanum lycopersicum cv. Moneyberg	IL6e	QTL		Quercetin coumaroyl hexose-deoxyhexose-hexoside	3.5-fold increase	6	39.23 Mbp	46.04 Mbp		Ballester et al. (2016)
Tomato	ILs Solanum chmielewskii (LA1840) x Solanum lycopersicum cv. Moneyberg	IL6e	QTL		Quercetin-hexose-deoxyhexose-C12H12O5	2.2-fold increase	6	39.23 Mbp	46.04 Mbp		Ballester et al. (2016)
Tomato	ILs Solanum chmielewskii (LA1840) x Solanum lycopersicum cv. Moneyberg	IL7b	QTL		Kaempferol feruloyl dihexose-deoxyhexoside	1.8-fold increase	7	2.09 Mbp	62.85 Mbp		Ballester et al. (2016)
Tomato	ILs Solanum chmielewskii (LA1840) x Solanum lycopersicum cv. Moneyberg	IL7d	QTL		4,5-Dicaffeoylquinic acid	3.1-fold increase	7	1.00 Mbp	2.86 Mbp	Solyc07g005760 (HQT, Hydroxycinnamoyl CoA shikimate/quinate hydroxycinnamoyltransferase)	Ballester et al. (2016)
Tomato	ILs Solanum chmielewskii (LA1840) x Solanum lycopersicum cv. Moneyberg	IL7d	QTL		3,4,5-Tricaffeoylquinic acid	2.7-fold increase	7	1.00 Mbp	2.86 Mbp	Solyc07g005760 (HQT, Hydroxycinnamoyl CoA shikimate/quinate hydroxycinnamoyltransferase)	Ballester et al. (2016)
Tomato	ILs Solanum chmielewskii (LA1840) x Solanum lycopersicum cv. Moneyberg	IL7d	QTL		Dicaffeoylquinic acid isomer I	1.9-fold increase	7	1.00 Mbp	2.86 Mbp	Solyc07g005760 (HQT, Hydroxycinnamoyl CoA shikimate/quinate hydroxycinnamoyltransferase)	Ballester et al. (2016)
Tomato	ILs Solanum chmielewskii (LA1840) x Solanum lycopersicum cv. Moneyberg	IL7d	QTL		3-Caffeoylquinic acid (Chlorogenic acid)	1.6-fold increase	7	1.00 Mbp	2.86 Mbp	Solyc07g005760 (HQT, Hydroxycinnamoyl CoA shikimate/quinate hydroxycinnamoyltransferase)	Ballester et al. (2016)
Tomato	ILs Solanum chmielewskii (LA1840) x Solanum lycopersicum cv. Moneyberg	IL8a	QTL		Phloridzin-C-diglucoside	2.6-fold increase	8	1.00 Mbp	54.52 Mbp		Ballester et al. (2016)
Tomato	ILs Solanum chmielewskii (LA1840) x Solanum lycopersicum cv. Moneyberg	IL8a	QTL		Quercetin-deoxyhexose-hexoside-C17H24O8	1.8-fold increase	8	1.00 Mbp	54.52 Mbp		Ballester et al. (2016)
Tomato	ILs Solanum chmielewskii (LA1840) x Solanum lycopersicum cv. Moneyberg	IL8a	QTL		Naringenin-hexose isomer IV	1.5-fold decrease	8	1.00 Mbp	54.52 Mbp		Ballester et al. (2016)
Tomato	ILs Solanum chmielewskii (LA1840) x Solanum lycopersicum cv. Moneyberg	IL9a	QTL		Kaempferol 3-O-rutinoside	1.3-fold increase	9	0.43 Mbp	3.44 Mbp		Ballester et al. (2016)
Tomato	ILs Solanum chmielewskii (LA1840) x Solanum lycopersicum cv. Moneyberg	IL9c	QTL		Quercetin feruloyl deoxyhexose-dihexose	2.3-fold increase	9	3.53 Mbp	66.40 Mbp		Ballester et al. (2016)
Tomato	ILs Solanum chmielewskii (LA1840) x Solanum lycopersicum cv. Moneyberg	IL9d	QTL		Quercetin-deoxyhexose-hexoside-C17H24O8	1.7-fold increase	9	59.44 Mbp	66.40 Mbp		Ballester et al. (2016)
Tomato	ILs Solanum chmielewskii (LA1840) x Solanum lycopersicum cv. Moneyberg	IL9d	QTL		Quercetin-hexose-deoxyhexose-hexoside-C9H10O2	1.7-fold decrease	9	59.44 Mbp	66.40 Mbp		Ballester et al. (2016)
Tomato	ILs Solanum chmielewskii (LA1840) x Solanum lycopersicum cv. Moneyberg	IL9d	QTL		Quercetin-pentose-deoxyhexose-dihexoside	3.2-fold decrease	9	59.44 Mbp	66.40 Mbp		Ballester et al. (2016)
Tomato	ILs Solanum chmielewskii (LA1840) x Solanum lycopersicum cv. Moneyberg	IL10b	QTL		3,4-Dicaffeoylquinic acid or 3,5-Dicaffeoylquinic acid	2.0-fold increase	10	0.54 Mbp	58.06 Mbp		Ballester et al. (2016)
Tomato	ILs Solanum chmielewskii (LA1840) x Solanum lycopersicum cv. Moneyberg	IL12d	QTL		4,5-Dicaffeoylquinic acid	2.4-fold decrease	12/12/10	47.85 Mbp/61.71 Mbp/1.00 Mbp	48.89 Mbp/65.49 Mbp/1.69 Mbp		Ballester et al. (2016)
Tomato	ILs Solanum chmielewskii (LA1840) x Solanum lycopersicum cv. Moneyberg	IL12d	QTL		3,4,5-Tricaffeoylquinic acid	2.8-fold decrease	12/12/10	47.85 Mbp/61.71 Mbp/1.00 Mbp	48.89 Mbp/65.49 Mbp/1.69 Mbp		Ballester et al. (2016)
Tomato	ILs Solanum chmielewskii (LA1840) x Solanum lycopersicum cv. Moneyberg	IL12d	QTL		Naringenin chalcone	2.1-fold decrease	12/12/10	47.85 Mbp/61.71 Mbp/1.00 Mbp	48.89 Mbp/65.49 Mbp/1.69 Mbp		Ballester et al. (2016)
Tomato	ILs Solanum habrochaites (LA1777) x Solanum lycopersicum cv. E6203	IL5.035 (LA3984)	QTL		Rutin	increase	5	4.47 Mbp	4.88 Mbp		Hanson et al. (2014)
Tomato	BC2F2 Solanum habrochaites (LA1223) x Solanum lycopersicum TA1166		QTL		Total phenolics	8% increase	1	150.00 cM			Ökmen et al. (2011)
Tomato	BC2F2 Solanum habrochaites (LA1223) x Solanum lycopersicum TA1166		QTL		Flavonoids	26% decrease	2	67.00 cM			Ökmen et al. (2011)
Tomato	BC2F2 Solanum habrochaites (LA1223) x Solanum lycopersicum TA1166		QTL		Flavonoids	23% decrease	3	106.00 cM			Ökmen et al. (2011)
Tomato	BC2F2 Solanum habrochaites (LA1223) x Solanum lycopersicum TA1166		QTL		Flavonoids	9% decrease	5	6.81 cM			Ökmen et al. (2011)
Tomato	BC2F2 Solanum habrochaites (LA1223) x Solanum lycopersicum TA1166		QTL		Total phenolics	11% increase	6	92.00 cM			Ökmen et al. (2011)
Tomato	BC2F2 Solanum habrochaites (LA1223) x Solanum lycopersicum TA1166		QTL		Total phenolics	17% increase	7	90.00 cM			Ökmen et al. (2011)
Tomato	BC2F2 Solanum habrochaites (LA1223) x Solanum lycopersicum TA1166		QTL		Total phenolics	10% increase	9	37.60 cM			Ökmen et al. (2011)
Tomato	BC2F2 Solanum habrochaites (LA1223) x Solanum lycopersicum TA1166		QTL		Flavonoids	24% increase	11	16.40 cM			Ökmen et al. (2011)
Tomato	BC2F2 Solanum habrochaites (LA1223) x Solanum lycopersicum TA1166		QTL		Total phenolics	9% increase	12	32.70 cM			Ökmen et al. (2011)
Tomato	GWAS (96 cultivated genotypes)		QTL	PHE_8	Total phenolics	Increase	8	62.35 Mbp	62.35 Mbp	Solyc08g082350.2.1 (protein of unknown function)	Ruggieri et al. (2014)
Tomato	GWAS (96 cultivated genotypes)		QTL	PHE_11	Total phenolics	Increase	11	3.26 Mbp	3.26 Mbp	Solyc11g010170.1.1 (LanC-like protein2)	Ruggieri et al. (2014)
Tomato	RILs, ILs and SubILs Solanum pimpinellifolium (TO-937) x Solanum lycopersicum cv. Moneymaker		QTL	ph1.1	Total phenolics	decrease	1	64.5	115.6	Solyc01g079620 (SlMYB12), Solyc01g079240 (LONG CHAIN ACYL SYNTHETASE 1), Solyc01g056340 (DE-ETIOLATED1)	Barraj Barraj et al., 2021
Tomato	RILs, ILs and SubILs Solanum pimpinellifolium (TO-937) x Solanum lycopersicum cv. Moneymaker		QTL	ph4.1	Total phenolics	20% increase	4	48.2	79.9	Solyc04g014370 (PASTICCINO 2)	Barraj Barraj et al., 2021
Tomato	RILs, ILs and SubILs Solanum pimpinellifolium (TO-937) x Solanum lycopersicum cv. Moneymaker		QTL (green stage)	ph5.1	Total phenolics	increase	5	15.5	24.3	Solyc05g008250 (GLABRA 1)	Barraj Barraj et al., 2021
Tomato	RILs, ILs and SubILs Solanum pimpinellifolium (TO-937) x Solanum lycopersicum cv. Moneymaker		QTL (green stage)	ph5.2	Total phenolics	increase	5	126.6	129.4		Barraj Barraj et al., 2021
Tomato	RILs, ILs and SubILs Solanum pimpinellifolium (TO-937) x Solanum lycopersicum cv. Moneymaker		QTL	ph7.1	Total phenolics	decrease	7	34.9	46.7		Barraj Barraj et al., 2021
Tomato	RILs, ILs and SubILs Solanum pimpinellifolium (TO-937) x Solanum lycopersicum cv. Moneymaker		QTL	ph7.2	Total phenolics	decrease	7	66.2	71.6		Barraj Barraj et al., 2021
Tomato	RILs, ILs and SubILs Solanum pimpinellifolium (TO-937) x Solanum lycopersicum cv. Moneymaker		QTL	ph8.1	Total phenolics	decrease	8	64.2	74.4	Solyc08g067260 (FIDDLEHEAD), Solyc08g067410 (KCS11-like1)	Barraj Barraj et al., 2021
Tomato	RILs, ILs and SubILs Solanum pimpinellifolium (TO-937) x Solanum lycopersicum cv. Moneymaker		QTL	-	Total phenolics	Positive epistatic effect over QTL in Chr 12	11	58.1	60		Barraj Barraj et al., 2021
Tomato	RILs, ILs and SubILs Solanum pimpinellifolium (TO-937) x Solanum lycopersicum cv. Moneymaker		QTL	ph12.1	Total phenolics	30% increase	12	39.4	44.1		Barraj Barraj et al., 2021
Tomato	RILs, ILs and SubILs Solanum pimpinellifolium (TO-937) x Solanum lycopersicum cv. Moneymaker		QTL	ph12.1	Total phenolics	40% decrease	12	107	119.7		Barraj Barraj et al., 2021
Eggplant	F2 population from '305E40' x '67/3'	E04	mQTL	CGAE04.ML, CGAE04.MT	Chlorogenic acid	increase ('305E40' allele)	4	116.64 Mbp	116.64 Mbp		Toppino et al. (2016)
Eggplant	F2 population from '305E40' x '67/3'	E06	mQTL	CGAE06.ML, CGAE06.MT	Chlorogenic acid	increase ('305E40' allele)	6	-	-		Toppino et al. (2016)
Eggplant	ILs S. melongena 'ANS26' x S. incanum 'MM577'	SMI_7.1, SMI_7.2, SMI_7.5	mQTL	cga7	Chlorogenic acid	33.5% decrease	7	129.00 Mbp	135.00 Mbp	SMEL_007g290860.1 (PAL1, phenylalanine ammonia-lyase 1), SMEL_007g288660.1.01 (peroxidase), SMEL_007g288680.1.01 (peroxidase), SMEL_007g288690.1.01 (peroxidase)	Rosa-Martínez et al. (2022a)
Eggplant	ILs S. melongena 'ANS26' x S. incanum 'MM577'	SMI_3.1	mQTL	cga3.HN, cga3.LN	Chlorogenic acid	33.0% decrease (cga3.HN), 66.0% decrease (cga3.LN)	3	7.0 Mbp	86.0 Mbp	SMEL_003g185030.1 (4CL2, 4-coumarate-CoA ligase 2)	Rosa-Martínez et al. (2022b)
Eggplant	ILs S. melongena 'ANS26' x S. incanum 'MM577'	SMI_5.1	mQTL	cga5.HN	Chlorogenic acid	42.8% decrease	5	35.0 Mbp	43.0 Mbp		Rosa-Martínez et al. (2022b)
Eggplant	ILs S. melongena 'ANS26' x S. incanum 'MM577'	SMI_7.1	mQTL	cga7.HN	Chlorogenic acid	34.8% decrease	7	9.0 Mbp	137.0 Mbp	SMEL_007g275930.1 (4CL5, 4-coumarate-CoA ligase 5), SMEL_007g290860.1 (PAL6, phenylalanine ammonia-lyase 6)	Rosa-Martínez et al. (2022b)
Eggplant	ILs S. melongena 'ANS26' x S. incanum 'MM577'	SMI_12.6	mQTL	cga12.HN	Chlorogenic acid	43.3% decrease	12	3.0 Mbp	96.0 Mbp		Rosa-Martínez et al. (2022b)
Eggplant	ILs S. melongena 'ANS26' x S. incanum 'MM577'	SMI_3.1	mQTL	tpc3.LN	Total phenolics	33.7% decrease	3	7.0 Mbp	86.0 Mbp	SMEL_003g185030.1 (4CL2, 4-coumarate-CoA ligase 2)	Rosa-Martínez et al. (2022b)
Eggplant	ILs S. melongena 'ANS26' x S. incanum 'MM577'	SMI_12.6	mQTL	tpc12.HN	Total phenolics	38.2% decrease	12	3.0 Mbp	96.0 Mbp		Rosa-Martínez et al. (2022b)
Eggplant	BC₂ and BC₃ S. melongena 'MEL3' × S. elaeagnifolium 'ELE2'	-	QTL	ca1	Chlorogenic acid HPLC-peak area	decrease	1	1.05 Mbp	1.42 Mbp		Villanueva et al. (2021)
Eggplant	BC₂ and BC₃ S. melongena 'MEL3' × S. elaeagnifolium 'ELE2'	-	QTL	cp1	Phenolic acid HPLC-peaks pattern	phenolic acids pattern more similar to S. elaeagnifolium	1	1.05 Mbp	1.42 Mbp		Villanueva et al. (2021)
Eggplant	BC₂ and BC₃ S. melongena 'MEL3' × S. elaeagnifolium 'ELE2'	-	QTL	cg5	Chlorogenic acid	increase	5	3.94 Mbp	4.49 Mbp		Villanueva et al. (2021)
Eggplant	BC₂ and BC₃ S. melongena 'MEL3' × S. elaeagnifolium 'ELE2'	-	QTL	ph6	Total phenolic acid HPLC-peaks area	increase	6	99.76 Mbp	100.78 Mbp	SMEL_006g261420.1.01 (CCR1, cinnamoyl-CoA reductase 1), SMEL_006g261630.1.01 (4CL2, 4-coumarate-CoA ligase 2)	Villanueva et al. (2021)
Eggplant	F6 RIL population from '305E40' x '67/3'	-	mQTL	P-KSOPH.7.1	kaempferol 3-O-beta-D-sophoroside	increase ('305E40' allele)	7	86.4 cM	86.4 cM	SMEL_007g288740.1 (Similar to CYCU1-1: Cyclin-U1-1); SMEL_007g288700.1; SMEL_007g288720.1 (Similar to PCMP-A3: Pentatricopeptide repeat-containing protein At1g71460%2C); SMEL_007g288660.1 (Similar to PER3: Peroxidase 3 (Arabidopsis thaliana OX%3D3702)); SMEL_007g288690.1; SMEL_007g288730.1 (Similar to PEX22: Peroxisome biogenesis protein 22); SMEL_007g288920.1 (Similar to BHLH117: Transcription f…	Sulli et al. (2021)
Eggplant	F6 RIL population from '305E40' x '67/3'	-	mQTL	P-KSOPH.10.1	kaempferol 3-O-beta-D-sophoroside	increase ('305E40' allele)	10	231.50 cM	231.5 cM	SMEL_010g353210.1; SMEL_010g352840.1 (Similar to WAK2: Wall-associated receptor kinase 2); SMEL_010g352880 (PYL4 abscisic acid receptor); SMEL_010g352930.1 (Similar to DREB2C: Dehydration-responsive element-binding protein 2C); SMEL_010g353090.1 (Similar to RAPTOR1: Regulatory-associated protein of TOR1); SMEL_010g353110.1; SMEL_010g353170.1 (Similar to peroxidases and cationic peroxidases); SMEL…	Sulli et al. (2021)
Eggplant	F6 RIL population from '305E40' x '67/3'	-	mQTL	P-RUT.10.1	Rutin	increase ('67/3' allele)	10	230.20 cM	230.20 cM	SMEL_010g352880 (PYL4 abscisic acid receptor)	Sulli et al. (2021)
Pepper	F2 from Capsicum annuum AC1979 (no. 19) and Capsicum chinense No. 4661 Selection (no. 18)	P01	mQTL		Naringenin chalcone	increase (C. chinense allele)	1	89.63 cM	89.63 cM	CaMYB12	Wahyuni et al. (2014)
Pepper	F2 from Capsicum annuum AC1979 (no. 19) and Capsicum chinense No. 4661 Selection (no. 18)	P01	eQTL		Flavonol synthase (FLS)	increased expression (C. chinense allele)	1	89.63 cM	89.63 cM	CaMYB12	Wahyuni et al. (2014)
Pepper	F2 from Capsicum annuum AC1979 (no. 19) and Capsicum chinense No. 4661 Selection (no. 18)	P01	eQTL		Chalcone isomerase (CHI-2)	increased expression (C. chinense allele)	1	89.63 cM	89.63 cM	CaMYB12	Wahyuni et al. (2014)
Pepper	F2 from Capsicum annuum AC1979 (no. 19) and Capsicum chinense No. 4661 Selection (no. 18)	P01	eQTL		Chalcone synthase (CHS-1)	increased expression (C. chinense allele)	1	89.63 cM	89.63 cM	CaMYB12	Wahyuni et al. (2014)
Pepper	F2 from Capsicum annuum AC1979 (no. 19) and Capsicum chinense No. 4661 Selection (no. 18)	P01	eQTL		Chalcone synthase (CHS-2)	increased expression (C. chinense allele)	1	89.63 cM	89.63 cM	CaMYB12	Wahyuni et al. (2014)
Pepper	F2 from Capsicum annuum AC1979 (no. 19) and Capsicum chinense No. 4661 Selection (no. 18)	P01	eQTL		CaMYB12	increased expression (C. chinense allele)	1	89.63 cM	89.63 cM	CaMYB12	Wahyuni et al. (2014)
Pepper	F2 from Capsicum annuum AC1979 (no. 19) and Capsicum chinense No. 4661 Selection (no. 18)	P02	mQTL		Quercetin rhamnoside-glucoside	increase (C. chinense allele)	2	143.72 cM	143.72 cM		Wahyuni et al. (2014)
Pepper	F2 from Capsicum annuum AC1979 (no. 19) and Capsicum chinense No. 4661 Selection (no. 18)	P03c	eQTL		Flavonoid-3'-hydroxylase (F3'H-1)	increased expression (C. chinense allele)	3	40.38 cM	40.38 cM		Wahyuni et al. (2014)
Pepper	F2 from Capsicum annuum AC1979 (no. 19) and Capsicum chinense No. 4661 Selection (no. 18)	P04a	eQTL		Flavonoid-3'-hydroxylase (F3'H-3)	increased expression (C. chinense allele)	4	84.17 cM	84.17 cM		Wahyuni et al. (2014)
Pepper	F2 from Capsicum annuum AC1979 (no. 19) and Capsicum chinense No. 4661 Selection (no. 18)	P06	mQTL		Flavanone tri-methyl glucose pentose	increase (C. chinense allele)	6	79.86 cM	79.86 cM		Wahyuni et al. (2014)
Pepper	F2 from Capsicum annuum AC1979 (no. 19) and Capsicum chinense No. 4661 Selection (no. 18)	P06	eQTL		Flavone synthase (FS-2)	increased expression (C. chinense allele)	6	162.13 cM	162.13 cM		Wahyuni et al. (2014)
Pepper	F2 from Capsicum annuum AC1979 (no. 19) and Capsicum chinense No. 4661 Selection (no. 18)	P06	mQTL		Apigenin 6-C-pentoside-8-C-hexoside	increase (C. chinense allele)	6	162.13 cM	162.13 cM		Wahyuni et al. (2014)
Pepper	F2 from Capsicum annuum AC1979 (no. 19) and Capsicum chinense No. 4661 Selection (no. 18)	P06	mQTL		Luteolin 8-C-hexoside	increase (C. chinense allele)	6	162.13 cM	162.13 cM		Wahyuni et al. (2014)
Pepper	F2 from Capsicum annuum AC1979 (no. 19) and Capsicum chinense No. 4661 Selection (no. 18)	P06	mQTL		Luteolin 6-C-hexoside	increase (C. chinense allele)	6	162.13 cM	162.13 cM		Wahyuni et al. (2014)
Pepper	F2 from Capsicum annuum AC1979 (no. 19) and Capsicum chinense No. 4661 Selection (no. 18)	P06	mQTL		Apigenin 6,8-di-C-hexoside	increase (C. chinense allele)	6	162.13 cM	162.13 cM		Wahyuni et al. (2014)
Pepper	F2 from Capsicum annuum AC1979 (no. 19) and Capsicum chinense No. 4661 Selection (no. 18)	P06	eQTL		Flavone synthase (FS-2)	increased expression (C. chinense allele)	6	176.82 cM	176.82 cM		Wahyuni et al. (2014)
Pepper	F2 from Capsicum annuum AC1979 (no. 19) and Capsicum chinense No. 4661 Selection (no. 18)	P06	eQTL		Chalcone isomerase (CHI-4)	increased expression (C. annuum allele)	6	176.82 cM	176.82 cM		Wahyuni et al. (2014)
Pepper	F2 from Capsicum annuum AC1979 (no. 19) and Capsicum chinense No. 4661 Selection (no. 18)	P06	mQTL		Apigenin 6-C-pentoside-8-C-hexoside	increase (C. chinense allele)	6	176.82 cM	176.82 cM		Wahyuni et al. (2014)
Pepper	F2 from Capsicum annuum AC1979 (no. 19) and Capsicum chinense No. 4661 Selection (no. 18)	P06	mQTL		Luteolin 8-C-hexoside	increase (C. chinense allele)	6	176.82 cM	176.82 cM		Wahyuni et al. (2014)
Pepper	F2 from Capsicum annuum AC1979 (no. 19) and Capsicum chinense No. 4661 Selection (no. 18)	P06	mQTL		Luteolin 6-C-hexoside	increase (C. chinense allele)	6	176.82 cM	176.82 cM		Wahyuni et al. (2014)
Pepper	F2 from Capsicum annuum AC1979 (no. 19) and Capsicum chinense No. 4661 Selection (no. 18)	P06	mQTL		Apigenin 6,8-di-C-hexoside	increase (C. chinense allele)	6	176.82 cM	176.82 cM		Wahyuni et al. (2014)
Pepper	F2 from Capsicum annuum AC1979 (no. 19) and Capsicum chinense No. 4661 Selection (no. 18)	P07	mQTL		Flavanone tri-methyl glucose pentose	increase (C. annuum allele)	7	101.03 cM	101.03 cM		Wahyuni et al. (2014)
Pepper	F2 from Capsicum annuum AC1979 (no. 19) and Capsicum chinense No. 4661 Selection (no. 18)	P08	eQTL		Flavanone -3-hydroxylase (F3H)	increased expression (C. chinense allele)	8	23.72 cM	23.72 cM		Wahyuni et al. (2014)
Pepper	F2 from Capsicum annuum AC1979 (no. 19) and Capsicum chinense No. 4661 Selection (no. 18)	P09	eQTL		Chalcone synthase (CHS-1)	increased expression (C. chinense allele)	9	15.08 cM	15.08 cM		Wahyuni et al. (2014)
Pepper	F2 from Capsicum annuum AC1979 (no. 19) and Capsicum chinense No. 4661 Selection (no. 18)	P09	eQTL		Chalcone synthase (CHS-2)	increased expression (C. chinense allele)	9	15.08 cM	15.08 cM		Wahyuni et al. (2014)
Pepper	F2 from Capsicum annuum AC1979 (no. 19) and Capsicum chinense No. 4661 Selection (no. 18)	P09	eQTL		Chalcone isomerase (CHI-1)	increased expression (C. chinense allele)	9	15.08 cM	15.08 cM		Wahyuni et al. (2014)
Pepper	F2 from Capsicum annuum AC1979 (no. 19) and Capsicum chinense No. 4661 Selection (no. 18)	P09	eQTL		Chalcone isomerase (CHI-2)	increased expression (C. chinense allele)	9	15.08 cM	15.08 cM		Wahyuni et al. (2014)
Pepper	F2 from Capsicum annuum AC1979 (no. 19) and Capsicum chinense No. 4661 Selection (no. 18)	P09	eQTL		Flavone synthase (FS-2)	increased expression (C. chinense allele)	9	15.08 cM	15.08 cM		Wahyuni et al. (2014)
Pepper	F2 from Capsicum annuum AC1979 (no. 19) and Capsicum chinense No. 4661 Selection (no. 18)	P09	mQTL		Naringenin chalcone	increase (C. chinense allele)	9	15.08 cM	15.08 cM		Wahyuni et al. (2014)
Pepper	F2 from Capsicum annuum AC1979 (no. 19) and Capsicum chinense No. 4661 Selection (no. 18)	P09	mQTL		Luteolin-methyl-acetyl-apiofuranosyl-hexose	increase (C. annuum allele)	9	67.86 cM	67.86 cM		Wahyuni et al. (2014)
Pepper	F2 from Capsicum annuum AC1979 (no. 19) and Capsicum chinense No. 4661 Selection (no. 18)	P09	mQTL		Luteolin-methyl-O-di-hexose	increase (C. annuum allele)	9	96.57 cM	96.57 cM		Wahyuni et al. (2014)
Pepper	F2 from Capsicum annuum AC1979 (no. 19) and Capsicum chinense No. 4661 Selection (no. 18)	P10b	mQTL		Quercetin 3-O-rhamnoside	increase (C. chinense allele)	10	7.00 cM	7.00 cM		Wahyuni et al. (2014)
Pepper	F2 from Capsicum annuum AC1979 (no. 19) and Capsicum chinense No. 4661 Selection (no. 18)	P11	mQTL		Ferulic acid-hexose II	increase (C. chinense allele)	11	23.68 cM	23.68 cM		Wahyuni et al. (2014)
Pepper	NILs, F₂ Capsicum annuum 'Long Sweet' (P12) × Capsicum annuum ‘AC2212’ (P24)	-	QTL	fc5.1	Quercetin-Methyl-O-hexose-O-rhamnose, other chalcones, flavonols and flavones	increased expression and acumulation (P12 allele)	5	228Mb	228Mb	Ca05g18430 (CaMYB12-like, MYB-like DNA-binding domain protein)	Wu et al., 2022
*	cM (tomato)	Tomato-EXPEN 2000/Tomato-EXPEN 1992 (if the other not available)
	cM (eggplant)	Sulli et al. (2021)	A recently developed single-nucleotide polymorphism (SNP)-based map (Toppino et al., 2020) was used for QTL detection. Overall, the map includes 7,249 SNP markers and spans 2,169 cM"
	cM (pepper)	Wahyuni et al. (2014)	"A genetic linkage map was constructed with AFLP and microsatellite markers as described by Maharijaya et al. (2012b)"
